## Current Bibliography.

Prepared by the Editor with the assistance of Miss Thursby-Pelham.

**N**OTE. The scope of the Bibliography is limited in the main to the area covered by the Council's activities, but there are included papers of general interest relating to other areas in North Temperate and Arctic regions and exceptionally elsewhere. Limnological references are not as a rule given, but papers relating to brackish waters and to salmon and freshwater fish studied by the Council are included.

Subscribers and those on the distribution list will receive regularly upon application to the Administrative Secretary copies of the Bibliography printed on one side of the page only, for use in making up card indices.

The Editor will be glad to be advised of emendations and additions to the Bibliography.

### 1) General Oceanography.

#### 1) a Expeditions.

- Longhena, M. La lettera di L. F. Marsili ad H. Boerhaave sul suo viaggio da Livornia a Londra e di qui alle coste Olandesi. *Boll. Pesca, Piscicoltura e Idrobiol.*, XIV, 387—451, Roma, 1938.
- Wordie, J. M. An Expedition to North West Greenland and the Canadian Arctic in 1937. *Geogr. Journ.*, XCII, 385—421, London, 1938.

#### 1) b Institutes.

- Anon. Rapport pour l'Année 1937. Institut Océanographique, Monaco, 1938.
- Anon. Scottish Marine Biological Association. Annual Report 1937—38. Glasgow, 1938.
- Fischer, E. Die Fischereiwissenschaftlichen Arbeiten der DWK., Abteilung Deutscher Seefischerei-Verein und des DSV. *Ber. Deutsch. wiss. Komm. f. Meeresf.*, N.F., IX, 135—59, Stuttgart, 1938.
- Granqvist, G. Havsforskningsinstitutets Verksamhet under År 1937. *Merentut. Julk.*, No. 119, Helsingfors, 1938.
- Hagmeier, A. Die Arbeiten der Biologischen Anstalt auf Helgoland. *Ber. Deutsch. wiss. Komm. f. Meeresf.*, N.F., IX, 65—110, Stuttgart, 1938.
- Heinrich, C. Einleitung. Die Arbeiten der Deutschen wissenschaftlichen Kommission für Meeresforschung in den Jahren 1934—1937. *Ber. Deutsch. wiss. Komm. f. Meeresf.*, N.F., IX, 53—63, Stuttgart, 1938.
- Heinrich, C. Die Arbeiten der Deutschen wissenschaftlichen Kommission für Meeresforschung. Jahresber. *Deutsch. Fisch.* 1937, 263—82, Berlin, 1938.
- Norway. Bergens Museum, Årsberetning 1937—38. Bergen, 1938.
- Remane, A. und Wattenberg, H. Das Institut für Meereskunde der Universität Kiel. *Kieler Meeresforsch.*, III, 1—16, Kiel, 1939.

- Richard, J. et Sirvent, L. Liste des opérations faites dans les parages de Monaco à bord de l'Eider et du Sténo pendant les années 1913 et 1914. Bull. Inst. Océanogr., No. 759, Monaco, 1938.
- Schulz, B. Die hydrographischen Arbeiten der Deutschen wissenschaftlichen Kommission für Meeresforschung. Ber. Deutsch. wiss. Komm. f. Meeresf., N.F., IX, 186—98, Stuttgart, 1938.
- Strodtmann, A. und Kändler, R. Die fischereiwissenschaftlichen Arbeiten der Ostsee-Abteilung Hamburg—Kiel. Ber. Deutsch. wiss. Komm. f. Meeresf., N.F., IX, 160—85, Stuttgart, 1938.

## 2) Hydrography.

### 2) a Apparatus and Methods.

- Ångström, A. On the Standardisation of Photoelectric Cells by means of Sun Radiation. Medd. från Göteborgs Högskolas Oceanogr. Inst., XIII, (Appendix) 27—34, Göteborg, 1937.
- Anon. Manual of Current Observations. U.S. Dept. of Comm., Coast and Geodetic Survey, Spec. Publ. No. 215, Washington, D.C., 1938.
- Bayliss, L. E. The photographic method for recording average illuminations. Journ. Mar. Biol. Assoc. U.K., N.S., XXIII, 99—118, Cambridge, 1938.
- Berger, F. Methodik der Gesamtposphor- und Phosphatbestimmung. Internat. Rev. d. ges. Hydrobiol. usw., 4/5, Leipzig, 1938.
- Engle, F. G. Automatic brake sounding machine. Hydrogr. Rev., XV, No. 2, 147—50, Monaco, 1938. Extract from Field Eng. Bull. No. 11, 1937.
- Okada, M. and Ogawa, T. Direct Determination of Salinity of Sea Water from Chlorine Titration. Bull. Japan. Soc. Sci. Fish., VII, 251—56, Tokyo, 1939.
- Schumacher, A. Noch einmal der Oberflächenschöpfer nach O. Sund. Ann. d. Hydrogr. usw., LXVI, 590, Berlin, 1938.
- Somma, A. Special Aspirating Thermometer for Measuring the Temperature of the Air at Sea. Hydrogr. Rev., XV, No. 2, 142—47, Monaco, 1938. Summarized Translation from Ann. d. R. Ist. Superiore Navale, VI, 1937.
- Tenani, M. On the recording of the set and drift of Ocean Currents. Hydrogr. Rev., XV, No. 2, 77—82, Monaco, 1938. Summarized translation from Boll. Com. Geod. Geof. Cons. Naz. d. Ricer., No. 3, 1937.
- Wattenberg, H. und Wittig, H. Über die Bestimmung der Titrationsalkalinität des Seewassers. Kieler Meeresforsch., III, 258—62, Kiel, 1939.

### 2) b Surveys.

- Ercegovic, A. Une contribution à la connaissance des conditions hydrographiques et biologiques du Lac de l'Île de Mljet (Mélèda). Acta Botanica, X, 50—60, Zagreb, 1935.
- Facy, L. La mer et les sables sur le littoral de l'Afrique Equatorial Français. Ann. Phys. du Globe, France d'Outre-Mer, XXVII, Paris, 1938.
- Greve, S. Echo Soundings. An Analysis of the Results. Carlsberg Foundation Oceanogr. Exped. round the World 1928—30, and previous "Dana" Expeditions, Dana Rep. No. 14, Copenhagen, 1938.
- Huntsman, A. G. International Passamaquoddy Fishery Investigations. Journ. du Conseil, XIII, 357—69, Copenhagen, 1938.

### 2) c Chemistry of Sea Water.

- Boury, M. Le plomb dans le milieu marin. Rev. Trav. Office des Pêches Marit., XI, 157—65, Paris, 1938.
- Buch, K. und Gripenberg, S. Jahreszeitlicher Verlauf der Chemischen und Biologischen Faktoren im Meerwasser bei Hangö im Jahre 1935. Merentut. Julk., No. 118, Helsingfors, 1938.
- Cooper, L. H. N. Salt error in determinations of phosphate in sea water. Journ. Mar. Biol. Assoc. U.K., N.S., XXIII, 171—78, Cambridge, 1938.
- Cooper, L. H. N. Redefinition of the anomaly of the nitrate-phosphate ratio. Journ. Mar. Biol. Assoc. U.K., N.S., XXIII, 179—80, Cambridge, 1938.

- Cooper, L. H. N. Phosphate in the English Channel, 1933—8 with a comparison with earlier years, 1916 and 1923—32. Journ. Mar. Biol. Assoc. U.K., N.S., XXIII, 181—96, Cambridge, 1938.
- Ercegovic, A. Recherches des conditions hydrographiques et celles du phytoplancton dans la Boka Kotorska (Bouches de Kotor). Ann. Inst. Océanogr. du Royaume de Yougoslavie, I, 91—110, Split, 1938. (In Croatian, French résumé).
- Finland. Havsvattnets Temperatur och Salthalt uti Finlands Kustvatten. Havsforskningsinstitutet, Helsingfors, 1938.
- Föyn, E., Karlik, B., Pettersson, H. and Rona, E. Radioactivity of Sea Water. Nature, CXLIII, 275—76, London, 1939.
- Goedecke, E. Die Temperatur- und Salzgehaltsanomalien des Oberflächenwassers der Deutschen Bucht auf Grund der deutschen Feuerschiffsbeobachtungen 1923—1936. Ber. Deutsch. wiss. Komm. f. Meeresf., N.S., IX, 254—63, Stuttgart, 1938.
- Graham, M. Phytoplankton and the Herring. Part III. Distribution of Phosphate in 1934—1936. Min. Agric. and Fish., Fish. Invest., Ser. II, XVI, No. 3, London, 1938.
- Graham, M. and Harding, J. P. Some observations of the hydrology and plankton of the North Sea and English Channel. Journ. Mar. Biol. Assoc. U.K., N.S., XXIII, 291—96, Cambridge, 1938.
- Granqvist, C. Zur Kenntnis der Temperatur und des Salzgehaltes des Baltischen Meeres an den Küsten Finnlands. Merentut. Julk., No. 122, Helsingfors, 1938.
- Hickling, C. F. The distribution of phosphates in the south-western area in April 1938. Journ. Mar. Biol. Assoc., U.K., N.S., XXIII, 197—200, Cambridge, 1938.
- Kemp, S. Oceanography and the Fluctuations in the Abundance of Marine Animals. Nature, CXLII, 777—79, London, 1938.
- Nadeau, A. Salinité des Eaux de l'Estuaire du St-Laurent. Contrib. Stat. Biol. du St-Laurent à Trois-Pistoles, No. 11, Québec, 1938.
- Palmén, E. Regular Observations of Temperature and Salinity in the Seas around Finland, July 1936—June 1937. Merentut. Julk., No. 120, Helsingfors, 1938.
- Rakestraw, N. W. and Emmel, V. M. The relation of dissolved oxygen to nitrogen in some Atlantic waters. Journ. Mar. Res., I, 207—16, New Haven, Conn., 1938.
- Trahms, O.-K. und Stoll, K. Hydrobiologische und hydrochemische Untersuchungen in den Rügenschens Boddengewässern während der Jahre 1936 und 1937. Kieler Meeresforsch., III, 61—98, Kiel, 1939.
- Vachon, A., Gaudry, R. et Bernard, R. Contribution à l'Étude des Phosphates dans l'Estuaire du St-Laurent. Contrib. Stat. Biol. du St-Laurent à Trois-Pistoles, No. 12, Québec, 1938.
- Wattenberg, H. Die Verteilung des Sauerstoffs und des Phosphats im Atlantischen Ozean. Erste Lieferung. Die Verteilung des Sauerstoffs im Atlantischen Ozean. Wiss. Ergebn. Deutsch. Atlant. Exped. a. d. Forsch.- und Vermessungsschiff "Meteor", 1925—1927, IX, 1—132, Berlin, 1938.

## 2) d Physical Properties: General.

- Seiwell, H. R. Application of the Distribution of Oxygen to the Physical Oceanography of the Caribbean Sea Region. Pap. in Phys. Oceanogr. and Meteor., VI, No. 1, Cambridge, Mass., 1938.

## 2) e Temperature.

- Böhnecke, G. Temperatur, Salzgehalt und Dichte an der Oberfläche des Atlantischen Ozeans. Lief. 2. Die Temperatur. Wiss. Ergebn. Deutsch. Atlant. Exped. a. d. Forsch.- und Vermessungsschiff "Meteor", 1925—1927, V, 187—249, Berlin, 1938.
- Finland. Havsvattnets Temperatur och Salthalt uti Finlands Kustvatten. Havsforskningsinstitutet, Helsingfors, 1938.
- Gaudry, R. Les Températures de l'Estuaire du St-Laurent. Contrib. Stat. Biol. du St-Laurent à Trois-Pistoles, No. 13, Québec, 1938.
- Goedecke, E. Die Temperatur- und Salzgehaltsanomalien des Oberflächenwassers der Deutschen Bucht auf Grund der deutschen Feuerschiffsbeobachtungen 1923—1936. Ber. Deutsch. wiss. Komm. f. Meeresf., N.F., IX, 254—63, Stuttgart, 1938.
- Goedecke, E. Die mittleren Temperaturverhältnisse im Oberflächenwasser der Irischen See. Ann. d. Hydrogr. usw., LXVI, 525—34, Berlin, 1938.

- Graham, M. and Harding, J. P. Some observations of the hydrology and plankton of the North Sea and English Channel. *Journ. Mar. Biol. Assoc. U.K., N.S.*, XXIII, 201—06, Cambridge, 1938.
- Granqvist, G. Zur Kenntnis der Temperatur und des Salzgehaltes des Baltischen Meeres an den Küsten Finnlands. *Merentut. Julk.*, No. 122, Helsingfors, 1938.
- Inoue, N. Short-Period Temperature Variations in the Coastal Summer Water observed by a Resistance Thermometer. *Bull. Japan. Soc. Sci. Fish.*, VII, 191—97, Tokyo, 1938.
- Mémery, H. Température de la mer et prévision du temps. *Bull. Soc. d'Océanogr. de France*, XVIII, 1750—52, Paris, 1938.
- Palmén, E. Regular Observations of Temperature and Salinity in the Seas around Finland, July 1936—June 1937. *Merentut. Julk.*, No. 120, Helsingfors, 1938.
- Roux, G. Isothermes mensuelles provisoires de l'eau de mer à la surface au large des côtes de Maroc. *Ann. Phys. du Globe, France d'Outre-Mer*, XXV, Paris, 1938.
- Sweden. Svenska Hydrografisk-Biologiska Kommissionens Fyrskottsundersökning år 1934. Göteborg, 1938.
- Sweden. Svenska Hydrografisk-Biologiska Kommissionens Fyrskottsundersökning år 1935. Göteborg, 1938.
- Wüst, G. Bodentemperatur und Bodenstrom in der atlantischen, indischen und pazifischen Tiefsee. *Gerlands Beitr. z. Geophys.*, LIV, 1—8, Leipzig, 1938.

## 2) f Submarine Illumination.

- Pettersson, H. and Poole, H. H. Measurements of Submarine Daylight. *Medd. från Göteborgs Högskolas Oceanogr. Inst.*, XIII, 1—26, Göteborg, 1937.
- Ruttner, F. und Sauberer, F. Durchsichtigkeit des Wassers und Planktonschichtung. *Internat. Rev. d. ges. Hydrobiol. usw.*, XXXVII, 405—19, Leipzig, 1938.

## 2) g Hydrodynamics.

- Bruevitch, S. V. Fluctuation causes in Caspian Sea. *Meteor. i. Hidrologia*, III, Moskau/Leningrad, 1938. (In Russian, English résumé).
- Coldewey, H. Meereswellen. *Seewart*, VII, 392—94, Hamburg, 1938.
- Goldberg, J. und Kempni, K. Die Schwingungen der Bucht von Bakar und das allg. Problem der Seiches von Buchten. *Bull. Internat. Acad. Yougoslave d. Sc. et des Beaux-Arts*, XXXI, Zagreb, 1937.
- Hartley, C. H. and Dunbar, M. J. On the hydrographic mechanism of the so-called brown zones associated with tidal glaciers. *Journ. Mar. Res.*, I, 305—11, New Haven, Conn., 1938.
- Kotchin, N. E. Sur le mouvement d'un liquide lourd dans un canal ayant un fond avec une marche. *Comptes Rendus, Acad. d. Sc. de l'URSS*, VIII, Moscou, 1938.
- Lek, L. Oceanographic Results. Part 3. Die Ergebnisse der Strom- und Serienmessungen. *Snellius Exped. 1928—30*, II, 1—169, Leiden, 1938.
- McEwen, G. F. Modern dynamic oceanography: Achievement of applications to ocean observations of principles of mechanics and heat. *Proc. Amer. Phil. Soc.*, II, Philadelphia, 1938.
- McEwen, G. F. Some energy relations between the sea surface and the atmosphere. *Journ. Mar. Res.*, I, 217—38, New Haven, Conn., 1938.
- Namias, J. Fluid Mechanics applied to the Study of Atmospheric Circulations. Part I. A Study of Flow Patterns with the Aid of Isentropic Analysis. B. Technique and Examples of Isentropic Analysis. *Pap. in Phys. Oceanogr. and Meteor.*, VII, No. 1, 18—71, Cambridge, Mass., 1938.
- Parr, A. E. Analysis of current profiles by a study of pycnometric distortion and identifying properties. *Journ. Mar. Res.*, I, 269—90, New Haven, Conn., 1938.
- Rossby, C. G. On the mutual adjustment of pressure and velocity distributions in certain simple current systems, II. *Journ. Mar. Res.*, I, 239—63, New Haven, Conn., 1938.
- Rossby, C. G. Fluid Mechanics applied to the Study of Atmospheric Circulations. Part I. A Study of Flow Patterns with the Aid of Isentropic Analysis. A. On the Maintenance of the Westerlies South of the Polar front. *Pap. in Phys. Oceanogr. and Meteor.*, VII, No. 1, 1—17, Cambridge, Mass., 1938.

- Seiwell, H. R. Über die ganz- und halbtägige Mondkomponente der internen Wellen im westlichen Nordatlantischen Ozean. *Ann. d. Hydrogr. usw.*, LXVI, 485—87, Berlin, 1938.
- Seiwell, H. R., and Parr, A. E. Discussion: Lateral mixing and vertical stability in the Caribbean Sea region. *Journ. Mar. Res.*, I, 264—67, New Haven, Conn., 1938.
- Simmers, R. G. Fluid Mechanics applied to the Study of Atmospheric Circulations. Part I. A Study of Flow Patterns with the Aid of Isentropic Analysis. C. Isentropic Analysis of a Case of anticyclogenesis. *Pap. in Phys. Oceanogr. and Meteor.*, VII, No. 1, 72—125, Cambridge, Mass., 1938.
- Stockman, V. B. Current line construction in the atmosphere and hydrosphere by the method of Sandström. *Meteor. i. Hidrologia*, III, Moskau/Leningrad, 1938. (In Russian, English résumé).
- Vigneron, H. The Ocean Waves. *Hydrogr. Rev.*, XV, No. 2, 128—29, Monaco, 1938. Reprinted from *La Nature*, Paris, 1938.
- Zubov, N. N. About the article by V. B. Stockman "Appliance of dynamic method of cultivation hydrological data in the study of Caspian Sea currents." *Meteor. i. Hidrologia*, III, Moskau/Leningrad, 1938. (In Russian, English résumé).

### 2) h Currents and Oceanic Circulation.

- Anon. Manual of Current Observations. U. S. Dept. of Comm., Coast and Geodetic Survey, Special Publ. No. 215, Washington, D. C., 1938.
- Böhnecke, G. Report on Current Measurements at Station No. 369 of the German Surveying Vessel "Meteor". *Hydrogr. Rev.*, XV, No. 2, 83—84, Monaco, 1938. Summarized translation from Supplement to *Ann. d. Hydrogr. usw.*, 1937.
- Ciocardel, R. La circulation générale des Eaux de la Mer Noire. *Ateliers Graphiques*, Bucarest, 1938. Translation in *Hydrogr. Rev.*, XV, No. 2, 87—92, Monaco, 1938.
- Defant, A. Aufbau und Zirkulation des Atlantischen Ozeans. *Sitz-Ber. Preuss. Akad. d. Wiss.*, 13/18, 1938.
- Deutsche Seewarte. Meereskundliche Beobachtungen auf deutschen Feuerschiffen der Nord- und Ostsee. Jahr 1937. Hamburg, 1938.
- Iselin, C. O'D. Problems in the Oceanography of the North Atlantic. *Hydrogr. Rev.*, XV, No. 2, 73—76, Monaco, 1938. Reprinted from *Nature*, CXLI, 772, 1938.
- Lek, L. Oceanographic Results. Part 3. Die Ergebnisse der Strom- und Serienmessungen. *Snellius Exped. 1929—30*, II, 1—169, Leiden, 1938.
- Lisitzin, E. Über den Zusammenhang zwischen Wind und Strom bei dem Feuerschiff Storbrotten im nördlichen Alandsmeer. *Journ. du Conseil*, XIII, 293—303, Copenhagen, 1938.
- Montgomery, R. B. Circulation in Upper Layers of Southern North Atlantic deduced with use of Isentropic Analysis. *Pap. in Phys. Oceanogr. and Meteor.*, VI, No. 2, Cambridge, Mass., 1938.
- Riis-Carstensen, E. Carte dynamique-topographique du courant Est-Groenlandais entre 74° et 79° Lat. N. *Geogr. Tidsskr.*, I, 41, Kjøbenhavn, 1938.
- Sweden. Svenska Hydrografisk-Biologiska Kommissionens Fyrskeppsundersökning år 1934. Göteborg, 1938.
- Sweden. Svenska Hydrografisk-Biologiska Kommissionens Fyrskeppsundersökning år 1935. Göteborg, 1938.
- Uda, M. Researches on "Siome" or Current Rip in the Seas and Oceans. *Geophys. Mag.*, XI, 307—72, Tokyo.
- Vallaux, C. Deep Circulation in the Oceans. *Hydrogr. Rev.*, XV, No. 2, 9—17, Monaco, 1938.
- Wüst, G. Bodentemperatur und Bodenstrom in der atlantischen, indischen und pazifischen Tiefsee. *Gerlands Beitr. z. Geophys.*, LIV, 1—8, Leipzig, 1938.

### 2) i Tides and Sea Level.

- Anon. Admiralty Tide Tables, Part II, 1938. London, 1938.
- Carruthers, J. N. Exceptional Tidal Streams in the Southern North Sea and Eastern English Channel. *Marine Observer*, XVI, 18—19, London, 1938.

- Fleming, R. H. Tides and tidal currents in the Gulf of Panama. *Journ. Mar. Res.*, I, 192—206, New Haven, Conn., 1938.
- Legrand, J. Contribution française à l'étude des niveaux moyens. *Comm. Internat. p. l'Explor. Sci. de la Mer Méditerranée, Rapp. et Proc.-Verb. d. Réun.*, N.S. XI, 167—98, Paris, 1938.
- Leypoldt, H. Bay of Fundy Tides. *Hydrogr. Rev.*, XV, No. 2, 112—19, Monaco, 1938. Reprinted from U. S. Naval Inst. Proc., 1938.
- Meissner, O. Über die Extremwasserstände einiger Ostseestationen in den Jahren 1902 bis 1935. *Ann. d. Hydrogr. usw.*, LXVI, 487—500, Berlin, 1938.
- Pettersson, H. Internal Waves, in Scandinavian Waters. *Comptes Rendus du Congrès Internat. de Géogr. Amsterdam 1938*, II, 77—86, Leiden, 1938.
- Rouch, J. La marée, sur les côtes de France. *Bull. Soc. d'Océanogr. de France*, XVIII, 1741—45, Paris, 1938.
- Schureman, P. Variations in yearly sea level. *Hydrogr. Rev.*, XV, No. 2, 135—37, Monaco, 1938. Reprinted from U. S. Dept. of Comm., Coast and Geodetic Survey, Spec. Publ. No. 207, Washington, D.C., 1938.
- Stenij, S. E. Vedenkorkeusarvoja 1935 ja 1936. *Merentut. Julk.*, No. 112, Helsingfors, 1938.
- Sweden. Svenska Hydrografisk-Biologiska Kommissionens Fyrskepsundersökning år 1934. Göteborg, 1938.
- Sweden. Svenska Hydrografisk-Biologiska Kommissionens Fyrskepsundersökning år 1935. Göteborg, 1938.
- Vercelli, F. Rapport sur les marées et les niveaux moyens. (1er Rapport). *Comm. Internat. p. l'Explor. Sci. de la Mer Méditerranée, Rapp. et Proc.-Verb. d. Réun.*, N.S., XI, 215—18, Paris, 1938.

## 2) j Geography, Geology and Bottom Deposits.

- Anon. Soundings in the North Atlantic Ocean. *Hydrogr. Rev.*, XV, No. 2, 66, Monaco, 1938.
- Berthois, L. et Furneston, J. Étude des sédiments dragués par le Président-Théodore-Tissier. *Rev. Trav. Office des Pêches Marit.*, XI, 381—424, Paris, 1938.
- Bradley, W. H. Mediterranean Sediments and Pleistocene Sea Levels. *Science*, N.S., LXXXVIII, 476—79, U. S. A., 1938.
- Hayami, S. Hydrological studies on the Yangtze River: Theory of silt transportation by running water. *Journ. Shanghai Sci. Inst.*, I, Sect. 1, 1938.
- Kuennen, P. H. Onderzeesche Canyons. *Tijdschr. K. Nederl. Aardrijksk. Genootsch.*, Leiden, 1938.
- Lux, R. Sur la teneur en matières organiques des sédiments marins à Monaco et à Concarneau. *Bull. Inst. Océanogr.*, No. 760, Monaco, 1938.
- Mailles, —. Comment surgissent les chaînes de montagnes et comment elles disparaissent. Comment se creusent les fonds marins et comment ils se combent. *Bull. Soc. d'Océanogr. de France*, XVIII, 1746—47, Paris, 1938.
- Obara, N. Studies of the Bottom Material of Simoda Bay, Idu Peninsula. *Rec. Oceanogr. Works in Japan*, X, 43—58, Tokyo, 1938.
- Piggot, C. S. Core Samples of the Ocean Bottom. *Hydrogr. Rev.*, XV, No. 2, 67—72, Monaco, 1938. Reprinted from *Smithsonian Report for 1936*.
- Utterback, C. L. and Sanderman, L. A. Radium content of some inshore bottom samples in the Pacific Northwest. *Journ. Mar. Res.*, I, 187—91, New Haven, Conn., 1938.
- Shepard, F. P. and Beard, C. N. Submarine Canyons: Distribution and longitudinal profiles. *Hydrogr. Rev.*, XV, No. 2, 120—27, Monaco, 1938. Reprinted from *Geogr. Rev.*, 1938.

## 2) k Ice.

- Blüthgen, J. Probleme der Vereisung von Meeresräumen. *Naturwiss.*, XXXVIII, Berlin, 1938.
- Oellrich, H. Die Eisverhältnisse des Winters 1937/38 in den ausserdeutschen europäischen Gewässern. *Ann. d. Hydrogr. usw.*, LXVI, 579—84, Berlin, 1938.
- Shoulejkin, W. W. The drift of Ice-fields. *Comptes Rendus, Acad. Sci. de l'URSS*, VIII, Moscou, 1938.

**2) Meteorology.**

- Anon. Bibliography of Meteorological Literature. Roy. Meteor. Soc., IV, No. 5 (January—June, 1938), London, 1938.
- Deutsche Seewarte. Meereskundliche Beobachtungen auf deutschen Feuerschiffen der Nord- und Ostsee. Jahr 1937. Hamburg, 1938.
- Hinterthan, W. Auswertung von Seegangsbeobachtungen im Nordatlantik. Werft, Reederei, Hafen, XXII, Berlin, 1938.
- Lisitzin, E. Über den Zusammenhang zwischen Wind und Strom bei dem Feuerschiff Storbrotten im nördlichen Ålandsmeer. Journ. du Conseil, XIII, 292—303, Copenhagen, 1938.
- Meinardus, W. Klimakunde der Antarktis. W. Köppen und R. Geiger, Handbuch der Klimatologie, Bd. IV, Teil U, Berlin, 1938.
- Namias, J. Fluid Mechanics applied to the Study of Atmospheric Circulations. Part I. A Study of Flow Patterns with the Aid of Isentropic Analysis. B. Technique and Examples of Isentropic Analysis. Pap. in Phys. Oceanogr. and Meteor., VII, No. 1, 18—71, Cambridge, Mass., 1938.
- Pierce, C. H. The Use of Vertical Cross-Sections in Studying Isentropic Flow. Monthly Weather Rev., LXVI, 263—67, Washington, D.C., 1938.
- Rosby, C.-G. Fluid Mechanics applied to the Study of Atmospheric Circulations. Part I. A Study of Flow Patterns with the Aid of Isentropic Analysis. A. On the Maintenance of the Westerlies South of the Polar Front. Pap. in Phys. Oceanogr. and Meteor., VII, No. 1, 1—17, Cambridge Mass., 1938.
- Rouch, J. Rapport sur la Météorologie (1er Rapport). Comm. Internat. p. l'Explor. Sci. de la Mer Méditerranée, Rapp. et Proc.-Verb. d. Réunion, N.S., XI, 219—83, Paris, 1938.
- Simmers, R. G. Fluid Mechanics applied to the Study of Atmospheric Circulations. Part I. A Study of Flow Patterns with the Aid of Isentropic Analysis. C. Isentropic Analysis of a Case of Anticyclogenesis. Pap. in Phys. Oceanogr. and Meteor., VII, No. 1, 72—125, Cambridge, Mass., 1938.
- Sweden. Svenska Hydrografisk-Biologiska Kommissionens Fyrskepsundersökning år 1934. Göteborg, 1938.
- Sweden. Svenska Hydrografisk-Biologiska Kommissionens Fyrskepsundersökning år 1935. Göteborg, 1938.

**3) Plankton.****3) a Apparatus and Methods.**

- Hentschel, E. Über quantitative Seihmethoden in der Planktonforschung. Journ. du Conseil, XIII, 304—08, Copenhagen, 1938.
- Marr, J. W. S. On the Operation of Large Plankton Nets. Discovery Rep., XVIII, 105—20, Cambridge, 1938.
- Wimpenny, R. S. A Routine Method for the Estimation of Fat in Plankton and its Application to Herring Tissues. Journ. du Conseil, XIII, 338—48, Copenhagen, 1938.

**3) b General.**

- Baron, G. Étude du plancton dans le bassin de Marennes. Rev. Trav. Office des Pêches Marit., XI, 167—88, Paris, 1938.
- Bernard, F. Rapport sur le Plancton (1er Rapport). Comm. Internat. p. l'Explor. Sci. de la Mer Méditerranée, Rapp. et Proc.-Verb. d. Réunion, N.S., XI, 289—300, Paris, 1938.
- Brunelli, G. Rapport sur le Plancton (1er Rapport). Comm. Internat. p. l'Explor. Sci. de la Mer Méditerranée, Rapp. et Proc.-Verb. d. Réunion, N.S., XI, 283—88, Paris, 1938.
- Buch, K. und Gripenberg, S. Jahreszeitlicher Verlauf der Chemischen und Biologischen Faktoren im Meerwasser bei Hangö im Jahre 1935. Merentut. Julk., No. 118, Helsingfors, 1938.
- Gillam, A. E., El Ridi, M. S. and Wimpenny, R. S. The Seasonal Variation in Biological Composition of Certain Plankton Samples from the North Sea in Relation to their Content of Vitamin A, Carotenoids, Chlorophyll, and Total Fatty Matter. Journ. Exper. Biol., XVI, 71—88, London, 1939.

- Graham M. and Harding, J. P. Some observations of the hydrology and plankton of the North Sea and English Channel. Journ. Mar. Biol. Assoc. U.K., N.S., XXIII, 207—10, Cambridge, 1938.
- Hentschel, E. Die Planktonarbeiten für die Deutsche wissenschaftliche Kommission für Meeresforschung in der Hydrobiologischen Abteilung des Hamburgischen Zoologischen Museums und Instituts. Ber. Deutsch. wiss. Komm. f. Meeresf., N.F., IX, 199—217, Stuttgart, 1938.
- Kemp, S. Oceanography and the Fluctuations in the Abundance of Marine Animals. Nature, CXLII, 777—79, London, 1938.
- Lucas, C. E. Some Aspects of Integration in Plankton Communities. Journ. du Conseil, XIII, 309—22, Copenhagen, 1938.
- Wimpenny, R. S. Diurnal Variation in the Feeding and Breeding of Zooplankton related to the Numerical Balance of the Zoo-Phytoplankton Community. Journ. du Conseil, XIII, 323—37, Copenhagen, 1938.

### 3) c Phytoplankton.

- Bernard, F. Résultats d'une année de recherches quantitatives sur le phytoplancton de Monaco. Comm. Internat. p. l'Explor. Sci. de la Mer Méditerranée, Rapp. et Proc.-Verb. d. Réunion, N.S., XI, 151—66, Paris, 1938.
- Ercegovic, A. Une contribution à la connaissance des conditions hydrographiques et biologiques du Lac de l'Île de Mljet (Méléda). Acta Botanica, X, 50—60, Zagreb, 1935.
- Ercegovic, A. Recherches des conditions hydrographiques et celles du phytoplancton dans la Boka Kotorska (Bouches de Kotor). Ann. Inst. Océanogr. du Royaume de Yougoslavie, I, 91—110, Split, 1938. (In Croatian, French résumé).
- Käsler, R. Biologische Sonderuntersuchungen. Lief. 3. Die Verbreitung der Dinophysiales im Südatlantischen Ozean. Wiss. Ergebn. Deutsch. Atlant. Exped. a. d. Forsch.- und Vermessungsschiff "Meteor", 1925—1927, XII, 165—247, Berlin, 1938.
- Klas, Z. Die Thiothermale Vegetation im Hafen von Split. Acta Adriatica, II, 49—94, Split, 1938.
- Riley, C. A. Plankton Studies. I. A preliminary investigation of the plankton of Tortugas region. Journ. Mar. Res., I, 335—52, New Haven, Conn., 1938.
- Zobell, C. E. and Long, J. H. Studies on the isolation of bacteriafree cultures of marine phytoplankton. Journ. Mar. Res., I, 328—34, New Haven, Conn., 1938.

### 3) d Zooplankton.

- Belloc, G. Liste des Tuniciers pélagiques capturés au cours de la cinquième croisière. Rev. Trav. Office des Pêches Marit., XI, 315—33, Paris, 1938.
- Bigelow, H. B. Plankton of the Bermuda Oceanographic Expeditions. VIII. Medusa taken during the Years 1929 and 1930. Zoologica, N. Y., XXIII, 99—189, New York, 1938.
- Conrad, W. Notes Protistologiques. IV. Flagellates nouveaux ou peu connus. Bull. Mus. Roy. d'Hist. Nat. de Belgique, XIV, No. 36, Bruxelles, 1938.
- Desbrosses, P. Première liste des Céphalopodes pêchés au cours de la cinquième croisière. Rev. Trav. Office des Pêches Marit., XI, 335—47, Paris, 1938.
- Dordevic, Z. Note sur la biologie de *Platynereis Dumerilii*. Ann. Inst. Océanogr. du Royaume de Yougoslavie, I, 141—52, Split, 1938. (In Serbian, French résumé).
- Eales, N. B. On the Larva of *Flustrella hispida* Fabricius. Mar. Biol. Stat. Port Erin, Isle of Man, Rep. for 1938 (No. 51), 33—36, Liverpool, 1938.
- Furnestin, J. Influence de la salinité sur la répartition du genre *Sagitta* dans l'Atlantique Nord-Est. Rev. Trav. Office des Pêches Marit., XI, 425—37, Paris, 1938.
- Gamulin, T. Rapport sur les études des copépodes planctoniques des environs de Split faites au cours de l'année 1936—1937. Ann. Inst. Océanogr. du Royaume de Yougoslavie, I, 51—61, Split, 1938. (In Croatian).
- Gamulin, T. Beitrag zur Kenntnis der planktonischen Kopepoden von Boka Kotorska. Ann. Inst. Océanogr. du Royaume de Yougoslavie, I, 110—21, Split, 1938. (In Croatian, German résumé).
- Gibbons, S. G. Early Development Stages of Copepoda. II. *Metridia lucens* Boeck. Ann. and Mag. Nat. Hist., 11th Ser., II, 493—97, London, 1938.



- Lebour, M. V. Notes on the breeding of some lamellibranchs from Plymouth and their larvae. Journ. Mar. Biol. Assoc. U.K., N.S., XXIII, 119—44, Cambridge, 1938.
- Rees, W. J. Observations on British and Norwegian hydroids and their medusae. Journ. Mar. Biol. Assoc. U.K., N.S., XXIII, 1—42, Cambridge, 1938.
- Rodewald, L. Beitrag zur Kenntnis der Systematik der Gastrotrichenfauna der Dobrogea. Zool. Anz., CXXIV, 74—80, Leipzig, 1938.
- Tattersall, W. M. The seasonal occurrence of mysids off Plymouth. Journ. Mar. Biol. Assoc. U.K., N.S., XXIII, 43—56, Cambridge, 1938.

### 3) e Physiology and Behaviour.

- Henschel, J. Vertikale Wanderungen und unperiodische Schwankungen des Copepodenplanktons im Fehmarnbelt, Juni/Juli, 1936. Kieler Meeresforsch., III, 99—113, Kiel, 1939.
- Montfort, C. Funktionstypen des Assimilationsapparates und das Problem der gelben Blattfarbstoffe. II. Die Bedeutung meereskundlicher Forschung für Grundfragen der Pflanzenphysiologie und der Vegetationskunde. Kieler Meeresforsch., III, 17—60, Kiel, 1939.
- Trahms, O.-K. und Stoll, K. Hydrobiologische und hydrochemische Untersuchungen in den Rügenschens Boddengewässern während der Jahre 1936 und 1937. Kieler Meeresforsch., III, 61—98, Kiel, 1939.
- Vinogradov, A. P. Chemical Composition of Marine Plankton. Trans. Inst. Mar. Fish. and Oceanogr. of the USSR, VII, 96—112, Moscow, 1938. (In Russian, English résumé).

## 4) Organic Production.

### 4) b Bacteria.

- Carey, C. L. The occurrence and distribution of nitrifying bacteria in the sea. Journ. Mar. Res., I, 291—304, New Haven, Conn., 1938.
- Klas, Z. Die Thiothermale Vegetation im Hafen von Split. Acta Adriatica, II, 47—94, Split, 1938.
- Schach, H. Ein Apparat zur Entnahme von Meerwasserproben aus der Tiefe für bakteriologische Untersuchungen. Journ. du Conseil, XIII, 340—65, Copenhagen, 1938.
- Tarr, D. L. A. Trimethylamine Formation in Relation to the Viable Bacterial Population of Spoiling Fish Muscle. Nature, CXLII, 1078, London, 1938.
- Watson, D. W. The influence of hydrogen-ion concentration on some acid resistant bacteria. Journ. Fish. Res. Board Canada, IV, 219—27, Toronto, 1938.
- Zobell, C. E. and Feltham, C. B. Bacteria as food for certain marine invertebrates. Journ. Mar. Res., I, 312—27, New Haven, Conn., 1938.

## 5) Bottom Fauna and Flora.

### 5) b Systematics and Development.

- Baba, K. Opisthobranchia of Kii, Middle Japan. Journ. Depart. Agric., Kyusyu Imp. Univ., VI, 1—19, Fukuoka, 1938.
- Billard, A. Note sur une espèce de Campanularidés (*Clytia Gravieri* Billard). Bull. Mus. Nation. d'Hist. Nat., 2e Sér., X, 429—32, Paris, 1938.
- Bokenham, N. A. H. and Neugebauer, F. L. M. The Vertical Distribution of certain Intertidal Marine Gastropods in False Bay, with Notes on the Development of Two of Them. With a Discussion by T. A. Stephenson. Ann. Natal Museum IX, 113—37, London, 1938.
- Brunelli, G. Coralli Bentonici Novici alle Reti a Strascico. Comm. Internat. p. l'Explor. Sci. de la Mer Méditerranée, Rapp. et Proc. Verb. d. Réunion., N.S., XI, 145—46, Paris, 1938.
- Coe, W. R. A new genus and species of *Hoplonemertea* having differential bipolar sexuality. Zool. Anz., CXXIV, 220—24, Leipzig, 1938.
- Desroses, P. Première liste des Céphalopodes pêchés au cours de la cinquième croisière. Rev. Trav. Office des Pêches Marit., XI, 335—47, Paris, 1938.
- Dordevic, Z. Note sur la biologie de *Platynereis Dumerilii*. Ann. Inst. Océanogr. du Royaume de Yougoslavie, I, 141—52, Split, 1938. (In Serbian, French résumé).

- Durivault, A. Cavités gastriques des polypes et canaux de la mésogée chez *Alcyonium palmatum* Pallas. Bull. Mus. Nation. d'Hist. Nat., 2e Sér., X, 512—17, Paris, 1938.
- Eguchi, M. A Systematic Study of the Reef-Building Corals of the Palao Islands. Palao Trop. Biol. Stat. Stud., No. 3, 325—90, Tokyo, 1938.
- Fischer, P.-H. et Fischer-Piette, E. Mollusques Lamellibranches recueillis aux Nouvelles-Hébrides par M. Aubert de la Rue. Bull. Mus. Nation. d'Hist. Nat., 2e Sér., X, 406—09, Paris, 1938.
- Friedrich, H. Einige neue Hoplonemertinen aus der Ostsee. Kieler Meeresforsch., III, 233—51, Kiel, 1939.
- Gardiner, J. S. and Waugh, P. The Flabellid and Turbinolid Corals. John Murray Exped. 1933—34, Sci. Rep., Brit. Mus. (Nat. Hist.) V, No. 7, 167—202, London, 1938.
- Cohar, H. A. F. On a new Xeniid Genus *Ejflatounaria*. Ann. and Mag. Nat. Hist., 11th Ser., III, 32—36, London, 1939.
- Gray, P. *Doropygus curvatus* n. sp., a notodelphyoid copepod commensal in *Styela partita* (Stps.) from the Wood's Hole region, Massachusetts. Zool. Anz., CXXIV, 261—69, Leipzig, 1938.
- Gurney, R. A late Larval Stage of the Sargassum Prawn, *Leander tenuicornis* (Say), and a Note on the Statocyst of the Adult. Ann. and Mag. Nat. Hist., 11th Ser., III, 120—26, London, 1939.
- Hadzi, J. Beitrag zur Kenntnis des Adriatischen Folliculiniden (inf. Heterotricha). I. Subfamilie: Eufolliculininae. Acta Adriatica, II, No. 1, Split, 1938.
- Hayashi, R. Sea-Stars of the Caroline Islands. Palao Trop. Biol. Stat. Stud., No. 3, 417—46, Tokyo, 1938.
- Heldt, J. H. La reproduction chez les crustacés Décapodes de la famille des Pénéides. Ann. Inst. Océanogr. Monaco, XVIII, 31—206, Paris, 1938.
- Hiro, F. A New Coral-inhabiting Crab, *Pseudocryptochirus viridis* gen. et sp. nov. (Hapalocarcinidae, Brachyura). Zool. Mag., L, 149—51, Tokyo, 1938.
- John, D. D. Crinoidea. Discovery Rep., XVIII, 121—222, Cambridge, 1938.
- Joubin, L. Cours d'Océanographie biologique. Les Echinides. Les Holothuries. Bull. Soc. d'Océanogr. de France, XVIII, 1753—59, Paris, 1938.
- Kato, K. Polyclads from Seto, Middle Japan. Japan. Journ. Zool., VII, 577—93, Tokyo, 1938.
- Komai, T. Stomatopoda occurring in the Vicinity of Kii Peninsula. Annot. Zool. Japon., XVII, 264—75, Tokyo, 1938.
- Kraïnska, M. Études sur l'oogenèse chez *Eupagurus prideauxi* Leach (Crustacea—Decapoda). Pubbl. Staz. Zool. di Napoli, XVII, 92—129, Roma, 1938.
- Kubo, I. A New Snapping Shrimp belonging to the genus *Synalpheus*. Annot. Zool. Japon., XVII, 89—92, Tokyo, 1938.
- Kunz, H. Harpacticoiden vom Sandstrand der Kurischen Nehrung. (Studien an marinen Copepoden. III.). Kieler Meeresforsch., III, 148—57, Kiel, 1939.
- Lamy, E. *Pinna* de l'Indochine. Bull. Mus. Nation. d'Hist. Nat., 2e Sér., X, 396—400, Paris, 1938.
- Lamy, E. et Fischer-Piette, E. Notes sur les espèces Lamarckiennes de *Venus* s. str. et de *Chione* (Moll. Lamellibr.). Bull. Mus. Nation. d'Hist. Nat., 2e Sér., X, 401—05, Paris, 1938.
- Lamy, E. et Fischer-Piette, E. Notes sur les espèces Lamarckiennes de *Timoclea*. Bull. Mus. Nation. d'Hist. Nat., 2e Sér., X, 509—11, Paris, 1938.
- Lebour, M. V. Notes on the breeding of some lamellibranchs from Plymouth, and their larvae. Journ. Mar. Biol. Assoc. U.K., N.S., XXIII, 119—44, Cambridge, 1938.
- Leloup, E. A Propos de deux Ischnochitons de l'Atlantique Occidentale: *I. boogii* Haddon, 1886 et *I. pruinosis* (Gould, 1846). Bull. Mus. Roy. d'Hist. Nat. de Belgique, XIV, No. 51, Bruxelles, 1938.
- Moore, H. B. The biology of *Purpura lapillus*. Part II. Growth. Journ. Mar. Biol. Assoc. U.K., N.S., XXIII, 57—66, Cambridge, 1938.
- Miyake, S. Galatheids obtained from Ōsima, Prov. Kii. Annot. Zool. Japon., XVII, 37—42, Tokyo, 1938.
- Okada, Y. and Mawatari, S. On the Collection of Bryozoa along the Coast of Wakayama-Ken, the Middle Part of Honsyu, Japan. Annot. Zool. Japon., XVII, 445—62, Tokyo, 1938.

- Panning, A. Systematisches über *Eriocheir sinensis* H.M.-Edw. Mitt. Hamburgisch. Zool. Mus. u. Inst., XLVII, 105—11, Hamburg, 1938.
- Peters, N. Zur Fortpflanzungsbiologie der Wollhandkrabbe (*Eriocheir sinensis* H.M.-Edw.). Mitt. Hamburgisch. Zool. Mus. u. Inst., XLVII, 112—28, Hamburg, 1938.
- Peters, N. Neue Untersuchungen über die Erdbauten der Wollhandkrabbe. Mitt. Hamburgisch. Zool. Mus. u. Inst., XLVII, 129—39, Hamburg, 1938.
- Reid, D. M. *Hyale ramalhoi*, sp. n. (Crustacea, Amphipoda). Ann. and Mag. Nat. Hist., 11th Ser., III, 29—32, London, 1939.
- Russell, F. S. On the nematocysts of hydromedusae. Journ. Mar. Biol. Assoc. U.K., N.S., XXIII, 145—66, Cambridge, 1938.
- Sakai, T. Brachyura obtained from Ōsima, Prov. Kii. Annot. Zool. Japon., XVII, 53—57, Tokyo, 1938.
- Schubert, K. Häutung, Wachstum und Alter der Wollhandkrabbe. Mitt. Hamburgisch. Zool. Mus. u. Inst., XLVII, 83—104, Hamburg, 1938.
- Schulz, E. Beiträge zur Morphologie und Systematik freilebender mariner Nematoden, I. Kieler Meeresforsch., III, 114—21, Kiel, 1939.
- Sheppard, E. M. The Coxal Joint and its Outgrowths in certain Isopod Crustacea. Ann. and Mag. Nat. Hist., 11th Ser., III, 161—74, London, 1939.
- Silén, L. Zur Kenntnis des Polymorphismus der Bryozoen. Die Avicularien der *Cheilostomata Anasca*. Zool. Bidrag. fr. Uppsala, XVII, 149—366, Uppsala, 1938.
- Theil, M. E. Naturgeschichte des Seemooses. Handb. Seefisch. Nordeuropas (A. Willer), III, Heft 3, Stuttgart, 1938.
- Topsent, É. Contribution nouvelle à la connaissance des Éponges des côtes d'Algérie. Les espèces nouvelles d'O. Schmidt, 1868. Bull. Inst. Océanogr., No. 758, Monaco, 1938.
- Torelli, B. Istologia e senescenza in *Ceriantus*. Pubbl. Staz. Zool. di Napoli, XVII, 1—19, Roma, 1938.
- Vestergaard, K. und Thorson, G. Über den Laich und die Larven von *Duxiuvelia plebeja*, *Polycera quadrilineata*, *Eubranchus pallidus* und *Limapontia capitata*. (Gastropoda Opisthobranchia). Zool. Anz., CXXIV, 129—38, Leipzig, 1938.
- Watkin, E. E. A revision of the amphipod genus *Bathyporeia* Lindström. Journ. Mar. Biol. Assoc. U.K., N.S., XXIII, 211—36, Cambridge, 1938.

### 5) c Distribution and Ecology.

- Augener, H. Beitrag zur Polychaetenfauna der Ostsee. Kieler Meeresforsch., III, 133—47, Kiel, 1939.
- Bassindale, R. The intertidal fauna of the Mersey estuary. Journ. Mar. Biol. Assoc., U.K., N.S., XXIII, 83—98, Cambridge, 1938.
- Bokenham, N. A. H. The Colonization of Denuded Rock Surfaces in the Intertidal Region of the Cape Peninsula. With a General Comment on the Results, by T. A. Stephenson. Ann. Natal Museum, IX, 47—81, London, 1938.
- Bokenham, N. A. H. and Neugebauer, F. L. M. The Vertical Distribution of certain Intertidal Marine Gastropods in False Bay, with notes on the Development of Two of Them. With a Discussion by T. A. Stephenson. Ann. Natal Museum, IX, 113—37, London, 1938.
- Breitfuss, L. Zur Kenntnis der Kalkschwamm-Fauna Jugoslawiens. Ann. Inst. Océanogr. du Royaume de Yougoslavie, I, 178—81, Split, 1938. (In German, Croatian résumé).
- Bruce, J. R. Faunistic Notes and Records. Mar. Biol. Stat. Port Erin, Isle of Man, Rep. for 1938 (No. 51), 18—32, Liverpool, 1938.
- Burkenroad, M. D. Further observations on Penaeidae of the Northern Gulf of Mexico. Bull. Bingham Oceanogr. Collect., VI, Art. 6, New Haven, Conn., 1939.
- Cadenat, J. Liste des Echinodermes recueillis pendant la cinquième croisière. Rev. Trav. Office des Pêches Marit., XI, 349—75, Paris, 1938.
- Elmhirst, R. *Todarodes sagittatus* (Lam.) in the Firth of Clyde. Scottish Naturalist, No. 234, 164, Edinburgh, 1938.
- Eyre, J. and Stephenson, T. A. The South African Intertidal Zone and its Relation to Ocean Currents. V. A Sub-tropical Indian Ocean Shore. Ann. Natal Museum, IX, 21—46, London, 1938.

- Eyre, J., Broekhuysen, G. J. and Crichton, M. I. The South African Intertidal Zone and its Relation to Ocean Currents. VI. The East London District. Ann. Natal Museum, IX, 83—111, London, 1938.
- Friedrich, H. Polychaeten-Studien, IV. Zur Polychaetenfauna der Barents-See. Kieler Meeresforsch., III, 122—32, Kiel, 1939.
- Hadzi, J. Zoologische Notizen. Ann. Inst. Océanogr. du Royaume de Yougoslavie, I, 181—93, Split, 1938. (In Serbian, German résumé).
- Hiro, F. Studies on the Animals inhabiting Reef Corals. II. Cirripeds of the Genera *Creusia* and *Pyrgoma*. Palao Trop. Biol. Stat. Stud., No. 3, 391—416, Tokyo, 1938.
- Holmes, P. F. and Pryor, M. G. M. Barnacles in Horsey Mere. Nature, CXLII, 795—96, London, 1938.
- John, D. D. Crinoidea. Discovery Rep., XVIII, 121—222, Cambridge, 1938.
- Kemp, S. Oceanography and the Fluctuations in the Abundance of Marine Animals. Nature, CXLII, 777—779, London, 1938.
- Kolovsáry, G. Echinodermen aus Boka Kotorska. Ann. Inst. Océanogr. du Royaume de Yougoslavie, I, 121—25, Split, 1938. (In Croatian, German résumé).
- Krüger, K. Ein neuer Fundort von *Acaulis primarius* Simpson. Kieler Meeresforsch., III, 262, Kiel, 1939.
- Krüger, K. Amphipodenfunde in der westlichen Ostsee. Kieler Meeresforsch., III, 263, Kiel, 1939.
- Leloup, E. Quelques Hydropolypes de la Baie de Sagami, Japon. Bull. Mus. Roy. d'Hist. Nat. de Belgique, XIV, No. 28, Bruxelles, 1938.
- Moore, H. B. The biology of *Purpura lapillus*. Part III. Life History and relation to environmental factors. Journ. Mar. Biol. Assoc. U.K., N.S., XXIII, 67—74, Cambridge, 1938.
- Nicol, E. A. T. Three Rare Crabs from the Inner Hebrides. Scottish Naturalist, No. 235, 1—4, Edinburgh, 1939.
- Nicol, E. A. T. Note on the Sipunculid *Physcosoma granulatum*. Scottish Naturalist, No. 235, 30, Edinburgh, 1939.
- Pearse, A. S. and Walker, A. M. Littoral polyclads from New England, Prince Edward Island and Newfoundland. Bull. Mt. Desert Is. Biol. Lab., 1939, 15—22, Salisbury Cove, Me., 1939.
- Panning, A. Die Verteilung der Wollhandkrabbe über das Flussgebiet der Elbe nach Jahrgängen. Mitt. Hamburgisch. Zool. Mus. u. Inst., XLVII, 65—82, Hamburg, 1938.
- Peters, N. Ausbreitung und Verbreitung der chinesischen Wollhandkrabbe (*Eriocheir sinensis* H.M.-Edw.) in Europa in den Jahren 1933 bis 1935. Mitt. Hamburgisch. Zool. Mus. u. Inst., XLVII, 1—31, Hamburg, 1938.
- Rawlinson, R. On the occurrence of *Jaxea nocturna* (Chierighin) Nardo off Rame Head, Devon. Journ. Mar. Biol. Assoc. U.K., N.S., XXIII, 79—81, Cambridge, 1938.
- Rees, W. J. Observations on British and Norwegian hydroids and their medusae. Journ. Mar. Biol. Assoc. U.K., N.S., XXIII, 1—42, Cambridge, 1938.
- Schulz, E. Über eine Mikrofauna im oberen Eulitoral auf Amrum. Kieler Meeresforsch., III, 158—64, Kiel, 1939.
- Stephenson, T. A., Stephenson, A. and Bright, K. M. F. The South African Intertidal Zone and its Relation to Ocean Currents. IV. The Port Elizabeth District. Ann. Natal Museum, IX, 1—19, London, 1938.
- Thiel, H. Die allgemeinen Ernährungsgrundlagen der chinesischen Wollhandkrabbe (*Eriocheir sinensis* H.M.-Edw.) in Deutschland, insbesondere im Einwanderungsgebiet im weiteren Sinne. Mitt. Hamburgisch. Zool. Mus. u. Inst., XLVII, 50—64, Hamburg, 1938.

#### 5) d Physiology and Behaviour.

- Abe, N. Feeding Behaviour and the Nematocyst of *Fungia* and 15 Other Species of Corals. Palao Trop. Biol. Stat. Stud., No. 3, 469—521, Tokyo, 1938.
- Cole, W. H. and Kazalski, L. A. A perfusing solution for the lobster heart and the effects of its constituent ions on the heart. Bull. Mt. Desert Is. Biol. Lab., 1939, 40—46, Salisbury Cove, Me., 1939.
- Graham, A. The Structure and Function of Alimentary Canal of Aeolid Molluscs, with a Discussion on their Nematocysts. Trans. Roy. Soc. Edinburgh, LIX, 267—307, Edinburgh, 1938.

- Hazelhoff, E. H. Über die Ausnutzung des Sauerstoffs bei verschiedenen Wasser-tieren. Zeitschr. f. vergl. Physiol., XXVI, 306—27, Berlin, 1938.
- Hosoi, K. Contributions to the Biochemistry of the Coral. I. On the Occurrence of Glycogen and its content of the Polyp of *Fungia actiniformis* var. *palawensis* Döderlein. II. On the Occurrence of Sugar and its content of the Polyp of *Fungia actiniformis* var. *palawensis* Döderlein. III. Copper Content of *Fungia actiniformis* var. *palawensis* Döderlein. Palao Trop. Biol. Stat. Stud., No. 3, 447—58, Tokyo, 1938.
- Gaffron, H. Reduction of Carbon Dioxide with Molecular Hydrogen in Green Algae. Nature, CXLIII, 204—05, London, 1939.
- Gray, J. Studies in Animal Locomotion: VIII. The Kinetics of Locomotion of *Nereis diversicolor*. Journ. Exper. Biol., XVI, 9—17, London, 1939.
- John, D. D. Crinoidea. Discovery Rep., XVIII, 121—222, Cambridge, 1938.
- Kitching, J. A. The Physiology of Contractile Vacuoles: IV. A Note on the Sources of the Water Evacuated, and on the Function of Contractile Vacuoles in Marine Protozoa. Journ. Exper. Biol., XVI, 34—37, London, 1939.
- Kleinholz, L. H. Color changes in Echinoderms. Pubbl. Staz. Zool. di Napoli, XVII, 53—57, Roma, 1938.
- Kühnelt, W. Beziehungen zwischen Kalkstoffwechsel und Atmung bei Mollusken der Meeresküste. Zool. Anz., CXXIV, 182—90, Leipzig, 1938.
- Lindroth, A. Studien über die respiratorischen Mechanismen von *Nereis virens* Sars. Zool. Bidrag fr. Uppsala, XVII, 367—497, Uppsala, 1938.
- Mitolo, M. Di un particolare riflesso cardiaco nei Cefalopodi. (Contributo all'indagine fisiologica sull'appendice del cuore branchiale). Pubbl. Staz. Zool. di Napoli, XVII, 34—52, Roma, 1938.
- Moment, G. Comparative observations on the blood cells of some Mount Desert Ascidiarians. Bull. Mt. Desert Is. Biol. Lab. 1939, 28—30, Salsbury Cove, Me., 1939.
- Moore, H. B. Algal Production and the Food Requirements of a Limpet. Proc. Malacol. Soc., XXIII, 117—18, Hertford, 1938.
- Okada, Y. K. An internal factor controlling posterior regeneration in syllid polychaetes. Journ. Mar. Biol. Assoc. U.K., N.S., XXIII, 75—78, Cambridge, 1938.
- Panning, A. Über die Wanderungen der Wollhandkrabbe. Markierungsversuche. Mitt. Hamburgisch. Zool. Mus. u. Inst., XLVII, 32—49, Hamburg, 1938.
- Peters, N. and Hoppe, H. Über Bekämpfung und Verwertung der Wollhandkrabbe. Mitt. Hamburgisch. Zool. Mus. u. Inst., XLVII, 140—71, Hamburg, 1938.
- Rothschild, —. The Effect of Phlorizin on the Metabolism of Cytolysing Sea-urchin Eggs. Journ. Exper. Biol., XVI, 49—55, London, 1939.
- Takahasi, K. On Some Castings of Sand in Korrör Island of the Palao Group. Palao Trop. Biol. Stat. Stud., No. 3, 459—68, Tokyo, 1938.

### 5) e Parasitic Forms.

- Goodrich, H. P. Nina: A Remarkable Gregarine. Quart. Journ. Microscop. Sci., N.S., LXXXI, 109—26, London, 1938.
- Nilsson-Cantell, C. A. Thoracic Cirripedes collected in 1925—1936. Discovery Rep., XVIII, 223—38, Cambridge, 1939.
- Nouvel, H. et Nouvel, L. Sur deux hôtes nouveaux de *Nectonoma*. Bull. Mus. Nation. d'Hist. Nat., 2e Sér., X, 507—08, Paris, 1938.
- Reinhard E. G. Rediscovery of the Rhizocephalan *Peltogaster Paguri* on the North American Coast. Science, N.S., LXXXIX, 80—81, U.S.A., 1939.
- Walker, A. M. and Pearse, A. S. Rhizocephala in Maine. Bull. Mt. Desert Is. Biol. Lab., 1939, 22—23, Salsbury Cove, Me., 1939.

### 5) f Marine Plants.

- Atkins, W. R. G. The disappearance of *Zostera marina*. Journ. Mar. Biol. Assoc. U.K., N.S., XXIII, 207—10, Cambridge, 1938.
- Blinks, L. R. Protoplasmic Potentials in *Halicystis*. VI. Role of Ammonia in Potential Reversal by Perfusion. Proc. Soc. Exper. Biol. and Med., XXXVIII, 663—64, New York, 1938.
- Haas, P., Hill, T. G., and Russell-Wells, B. On certain simple peptides occurring in marine algae. Biochem. Journ., XXXII, 2129—33, London, 1938.

- Hoffmann, C. Die praktische Bedeutung der Meeresalgen. Kieler Meeresforsch., III, 165—232, Kiel, 1939.
- Jacques, A. G. The Accumulation of Electrolytes. XII. Accumulation of Halide and Nitrate by *Valonia* in Hypertonic Solutions. Journ. Gen. Physiol., XXI, 775—80, Baltimore, 1938.
- Jacques, A. G. and Osterhout, W. J. V. The Accumulation of Electrolytes. XI. Accumulation of Nitrate by *Valonia* and *Halicystis*. Journ. Gen. Physiol., XXI, 767—73, Baltimore, 1938.
- Kirejeva, M. S. and Schapova, T. F. Rates of Growth, Age and Spore-Bearing of *Laminaria saccharina* and *L. digitata* in Kola-Fjord. Trans. Inst. Mar. Fish. and Oceanogr. of the USSR, VII, 29—52, Moscow, 1938. (In Russian, English résumé).
- May, V. A Key to the Marine Algae of New South Wales. Part I. Chlorophyceae. Proc. Linn. Soc. N. S. Wales, LXIII, 207—18, Sydney, 1938.
- Meyer, K. I. Materials on Algae Flora of the White Sea. Trans. Inst. Mar. Fish. and Oceanogr. of the USSR, VII, 5—28, Moscow, 1938. (In Russian, English résumé).
- Taylor, W. R. Marine Algae of the Northeastern Coast of North America. Univ. of Michigan Studies, Scient. Ser., XIII, Ann Arbor, 1937.
- Trofimov, A. V. On the Seasonal Modifications of Iodine and Chlorine Content in *Laminaria* of the Kola-Fjord. Trans. Inst. Mar. Fish. and Oceanogr. of the USSR, VII, 59—67, Moscow, 1938. (In Russian, English résumé).
- Trofimov, A. V. On Mineral Iodine in Living Algae. Trans. Inst. Mar. Fish. and Oceanogr. of the USSR, VII, 68—84, Moscow, 1938. (In Russian, English résumé).
- Trofimov, A. V. On the Appearing of Salts in Dry Algae. Trans. Inst. Mar. Fish. and Oceanogr. of the USSR, VII, 85—88, Moscow, 1938. (In Russian, English résumé).
- Vinogradov, A. P. and Bergman, G. C. The Iodine Content of Red Algae (Rhodophyceae). Trans. Inst. Mar. Fish. and Oceanogr. of the USSR, VII, 89—96, Moscow, 1938. (In Russian, English résumé).
- Vouk, V. Notizen über den Adriatischen Fucus (*Fucus virsoides* (Don) J. Ag.). Ann. Inst. Océanogr. du Royaume de Yougoslavie, I, 153—59, Split, 1938. (In Croatian, German résumé).

## 6) Fish.

### 6) a Systematics, Morphology and Development.

- Belloc, G. Liste des Poissons pélagiques et bathypélagiques capturés au cours de la cinquième croisière avec diagnose préliminaire de deux nouvelles. Rev. Trav. Office des Pêches Marit., XI, 281—313, Paris, 1938.
- Budker, P. Les Cryptes Sensorielles et les Denticules Cutanés des Plagiostomes. Ann. Inst. Océanogr., N.S., XVIII, 207—98, Paris, 1938.
- Butcher, E. O. The Structure of the Retina of *Fundulus heteroclitus* and the regions of the Retina associated with the different chromatophoric Responses. Journ. Exper. Zool., LXXIX, 275—97, Philadelphia, 1938.
- Cadenat, J. Note sur deux Poissons nouveaux de la côte Occidentale d'Afrique. Bull. Mus. Nation. d'Hist. Nat., 2e Sér., X, 361—68, Paris, 1938.
- Cawston, F. G. Normal Dentition of Sharks. Nature, CXLII, 878, London, 1938.
- Dollfus, R.-Ph. et Petit, G. Les *Syngnathidae* de la mer Rouge. Liste des espèces avec la description d'une sous-espèce nouvelle. Bull. Mus. Nation. d'Hist. Nat., 2e Sér., X, 496—506, Paris, 1938.
- Fowler, H. W. The Fishes of the George Vanderbilt South Pacific Expedition, 1937. Acad. Nat. Sci. Philadelphia, No. 2, Philadelphia, 1938.
- Fowler, H. W. Studies of Hong Kong Fishes — No. 3. Hong Kong Naturalist, No. 6, 1—52, Hong Kong, 1938.
- Fraser-Brunner, A. Notes on the Classification of certain British Fishes. Ann. and Mag. Nat. Hist., 11th Ser., II, 410—16, London, 1938.
- Hass, G. Ein Beitrag zur Trennung von *Gobius minutus* und *Gobius microps*. Kieler Meeresforsch., III, 252—57, Kiel, 1939.
- Joubin, L. Faune Ichthyologique de l'Atlantique Nord, No. 18. Cons. Perm. Internat. p. l'Explor. de la Mer, Copenhagen, 1938.
- Pitotti, M. Interrene, surreni, maturità sessuale e gestazione nei Selaci. Pubbl. Staz. Zool. di Napoli, XVII, 20—33, Roma, 1938.

- Schultz, L. P. Review of the Fishes of the Genera *Polyipnus* and *Argyropelecus* (Family Sternoptichidae), with descriptions of Three New Species. Proc. U.S. Nat. Mus., LXXXVI, 135—55, Washington, 1938.
- Taranetz, A. J. Handbook for Identification of Fishes of Soviet Far East and Adjacent Waters. Bull. Pacific Sci. Inst. of Fish. and Oceanogr., XI, 1—200, Vladivostok, 1937.
- Whitley, G. P. and Colefax, A. N. Fishes from Nauru, Gilbert Islands, Oceania. Proc. Linn. Soc. N. S. Wales, LXIII, 282—304, Sydney, 1938.

#### 6) b Distribution and Fluctuations.

- Gudger, E. W. A School of Whale Sharks in the Bahama Islands. Nature, CXLIII, 79, London, 1938.
- Gudger, E. W. Whale Sharks Struck by Fishing Boats off the Coast of Lower California. California Fish and Game, XXIV, 420—21, Sacramento, 1938.
- Kemp, S. Oceanography and the Fluctuations in the Abundance of Marine Animals. Nature, CXLII, 777—79, London, 1938.
- Kemp, S. Oceanography and the Fluctuations in the Abundance of Marine Animals. Nature, CXLII, 817—20, London, 1938.
- Lloyd, A. J. Occurrence of Burbot in the Estuary of the River Severn. Nature, CXLII, 1118—19, London, 1938.
- Roedel, P. M. Notes on the Ribbon Fish, *Trachipterus rex-salmonorum*. California Fish and Game, XXIV, 422—23, Sacramento, 1938.
- Stephen, A. C. Black-fish (*Centrolophus niger*) in the North Sea. Scottish Naturalist, No. 235, 30, Edinburgh, 1939.

#### 6) c Physiology and Behaviour.

- Belinskaya, K. G., Karpov, P. P. and Shapiro, O. I. A study of the chemical composition of protein in the Eggs of the different Acipenseridae. Trans. Inst. Mar. Fish. and Oceanogr. of the USSR, VI, 55—70, Moscow, 1937. (In Russian, English résumé).
- Binet, L. Expériences sur les poissons. Conclusions Médicales. Ann. Inst. Océanogr. Monaco, N.S., XVIII, 1—30, Paris, 1938.
- von Buddenbrock, W. Die physiologischen Arbeiten für die Deutsche wissenschaftliche Kommission für Meeresforschung. Ber. Deutsch. wiss. Komm. f. Meeresf. N.F., IX, 218—22, Stuttgart, 1938.
- Budker, P. Les Cryptes Sensorielles et les Denticules Cutanés des Plagiostomes. Ann. Inst. Océanogr. Monaco, XVIII, 207—88, Paris, 1938.
- Bull, H. O. Studies on Conditioned Responses in Fishes, Part VIII. Discrimination of Salinity Changes by Marine Teleosts. Dove Mar. Lab. Rep. Cullercoats, Ser. 3, No. 5, 19—36, Newcastle-on-Tyne, 1938.
- Cowan, D. Tank Life of Fish in the Aquarium at the Dove Marine Laboratory, Cullercoats. Dove Mar. Lab. Rep. Cullercoats, Ser. 3, No. 5, 37—40, Newcastle-on-Tyne, 1938.
- Dijk, P. J. S. van. Über die Regelung der Labyrinthatmung bei jungen und erwachsenen Exemplaren von *Osphromenus gurami*. Zeitschr. f. vergl. Physiol., XXVI, 328—46, Berlin, 1938.
- Doudoroff, P. Reactions of Marine Fishes to Temperature Gradients. Biol. Bull. Woods Hole, Mass., LXXV, 494—509, U.S.A., 1938.
- Eberhard, K., Fabricius, M. und Holst, F. Bausteine zu einer vergleichenden Physiologie der lokomotorischen Reflexe bei Fischen. Zeitschr. f. vergl. Physiol., XXVI, 467—80, Berlin, 1938.
- Ferguson, J. K. W., Horvath, S. M., and Pappenheimer, J. R. The Transport of Carbon Dioxide by Erythrocytes and Plasma in Dogfish Blood. Biol. Bull. Woods Hole, Mass., LXXV, 381—88, U.S.A., 1938.
- Fleischmann, W. und Kann, S. Wirkung von Hypophysenhormonen auf den Farbwechsel einiger Adriafische. Zeitschr. f. vergl. Physiol., XXV, 251—55, Berlin, 1937.
- Foefilaktov, V. V. and Karpov, P. P. The characteristic of the physical and chemical properties of proteins in the Eggs of *Acipenser stellatus*. Trans. Inst. Mar. Fish. and Oceanogr. of the USSR, VI, 49—54, Moscow, 1937. (In Russian, English résumé).

- Hager, H. J. Untersuchungen über das optische Differenzierungsvermögen der Fische. *Zeitschr. f. vergl. Physiol.*, XXVI, 282—302, Berlin, 1938.
- Jowett, W. G. and Davies, W. A Chemical Study of Some Australian Fish. Council for Sci. and Indust. Res., Pamphlet No. 85, Melbourne, 1938.
- Leiner, M. Die Physiologie der Fischatmung. Leipzig, 1938.
- Leiner, M. Die Augenkiemendrüse (Pseudobranchie) der Knochenfische, experimentelle Untersuchungen über ihre physiologische Bedeutung. *Zeitschr. f. vergl. Physiol.*, XXVI, 416—66, Berlin, 1938.
- Migita, M. and Hanaoka, T. Amount of Food Protein and the Accumulation of Body Protein in Fish. IV. Influence of some Feeding Conditions on the Growth of Fish. *Bull. Japan. Soc. Sci. Fish.*, VII, 288—96, Tokyo, 1939. (In Japanese, English résumé).
- Nabrit, S. M. Regeneration in the Tail Fins of Embryo Fishes (*Opsanus* and *Fundulus*). *Journ. Exper. Zool.*, LXXIX, 299—308, Philadelphia, 1938.
- Norman, J. R. Remoras or Sucking-Fishes. *Nature*, CXLIII, 52—55, London, 1939.
- Oppenheimer, J. M. Potencies for differentiation in the teleostean germ ring. *Journ. Exper. Zool.*, LXXIX, 185—212, Philadelphia, 1938.
- Osborn, C. L. The Role of the Melanophore-dispersing Principle of the Pituitary in the Color Change of the Catfish. *Journ. Exper. Zool.*, LXXIX, 209—30, Philadelphia, 1938.
- Pugsley, L. I. Further Studies on the Vitamin D Potency of Herring and Pilchard Oil. *Progress Rep. Pacific Biol. Stat. etc.*, No. 38, 7—9, Prince Rupert, B.C., 1938.
- Pugsley, L. I. The Yields and Vitamin A and D Potency of the Liver and Visceral Oils of Gray Cod (*Gadus microcephalus*). *Progress Rep. Pacific Biol. Stat. etc.*, No. 38, 15—16, Prince Rupert, B.C., 1938.
- Skramlik, E. v. Über den Blutumlauf bei *Amphioxus*. *Pubbl. Staz. Zool. di Napoli*, XVII, 130—57, Roma, 1938.
- Smith, W. W., Kiegher, H. and Naumann, R. The excretion of phosphate in the dogfish (*Squalus acanthias*). *Bull. Mt. Desert Is. Biol. Lab.*, 1939, 35—37, Salsbury Cove, Me., 1939.
- Smith, W. W., Tilson, K. and Farber, S. The excretion of phenol red in the dogfish, *Squalus acanthias*. *Bull. Mt. Desert Is. Biol. Lab.*, 1939, 37—39, Salsbury Cove, Me., 1939.
- Troast, L., Pitts, M. W., and Pitts, R. F. The excretion of creatine in the dogfish, *Squalus acanthias*. *Bull. Mt. Desert Is. Biol. Lab.*, 1939, 34—35, Salsbury Cove, Me., 1939.

#### 6) d Parasites and Diseases.

- Castelnuovo, G. e Risso, L. Caso di degenerazione cistica del fegato e di altri organi in *Troto iridea*. *Boll. Pesca, Piscicult. e Idrobiol.*, XIV, 452—459, Roma, 1938.
- Markowski, S. Contribution à la connaissance des Helminthes des Poissons de la Côte Belge. *Bull. Mus. Roy. d'Hist. Nat. de Belgique*, XIV, No. 43, Bruxelles, 1938.

### 7) Marine Fisheries.

#### 7) a Commercial Fisheries: Statistical.

- Ahlif, R. Die deutsche Hochseefischerei. *Jahresber. Deutsch. Fisch.*, 1937, 283—97, Berlin, 1938.
- d'Ancona, U. et Razzauti, A. Pesci e Pesca nella Acque dell' Arcipelago Toscano. *Comm. Internat. p. l'Explor. Sci. de la Mer Méditerranée*, Rapp. et Proc.-Verb. d. Réunion, N.S., XI, 129—44, Paris, 1938.
- Belloc, G. Biologie et pêche de l'étang de Biguglia. *Comm. Internat. p. l'Explor. Sci. de la Mer Méditerranée*, Rapp. et Proc.-Verb. d. Réunion, N.S., XI, 433—74, Paris, 1938.
- Bower, W. T. Alaska Fishery and Fur-Seal Industries in 1937. *U.S. Bureau Fish., Admin. Rep. No. 31*, 73—150, Washington, D.C., 1938.
- Brünneck, —. Das Fischmehl in der deutschen Fischwirtschaft. *Jahresber. Deutsch. Fisch.*, 1937, 329—40, Berlin, 1938.



- DeLoach, B. Trade in Fresh and Frozen Fishery Products and Related Marketing Considerations in the San Francisco Bay Area. U.S. Bureau Fish., II, Invest. Rep. No. 39, Washington, D.C., 1938.
- Eichelbaum, E. Die Seefischerei. Jahresber. Deutsch. Fisch., 1937, 5—74, Berlin, 1938.
- Eire. Report on the Sea and Inland Fisheries for the Year 1937. Dept. Agric. (Fish. Branch), Dublin, 1938.
- Fischer, E. Die Küstenfischerei und Kutter-Hochseefischerei. Jahresber. Deutsch. Fisch., 1937, 303—28, Berlin, 1938.
- Heinrici, C. Einleitung. Die Arbeiten der Deutschen wissenschaftlichen Kommission für Meeresforschung in den Jahren 1934—1937. Ber. Deutsch. wiss. Komm. f. Meeresf., N.F., IX, 53—63, Stuttgart, 1938.
- International Council. Bulletin Statistique des Pêches Maritimes pour l'année 1936. Cons. Perm. Internat. p. l'Explor. de la Mer, XXVI, Copenhague, 1938.
- Maldura, C. M. La pesca nelle Isole Italiane dell'Egeo. Boll. Pesca, Piscicoltura e Idrobiol., XIV, 460—81, Roma, 1938.
- Roddewig, K. Der örtliche und zeitliche Verlauf der Hochseefischerei ausserhalb der Küstengewässer. Jahresber. Deutsch. Fisch. 1937, 71—174, Berlin, 1938.
- Rosén, N. Författningar berörande det Bohuslänska Havfisket. Göteborg, 1938.
- Seurat, L. La pêche dans les Archipels de la Syrie Mineure. Comm. Internat. p. l'Explor. Sci. de la Mer Méditerranée, Rapp. et Proc.-Verb. d. Réunion., N.S., XI, 117—28, Paris, 1938.
- Stahner, M. Die Fischindustrie im Jahre 1937. Jahresber. Deutsch. Fisch., 1937, 341—48, Berlin, 1938.
- Sund, O. Die Norwegische Seefischerei. Handb. Seefisch. Nordeuropas (Lübbert u. Ehrenbaum), VIII, 1—181, Stuttgart, 1938.
- Sweden. Årsbok 1938. Göteborgs och Bohus Läns Havsfiskeförening. Göteborg, 1938.
- Zolezzi, G. La pesca all'amo in Liguria. Boll. Pesca, Piscicoltura e Idrobiol., XIV, 482—513, Roma, 1938.
- Zörner, H. Die Hauptvereinigung der Deutschen Fischwirtschaft. Jahresber. Deutsch. Fisch., 1937, 253—62, Berlin, 1938.

### 7) b Fish Technology.

- Anon. Note complémentaire sur le traitement et la conservation du poisson à Port-Etienne. Rev. Trav. Office des Pêches Marit., XI, 279, Paris, 1938.
- Boury, M. Rapport sur la Chimie marine et industrielle (4ème Rapport). Comm. Internat. p. l'Explor. Sci. de la Mer Méditerranée, Rapp. et Proc.-Verb. d. Réunion., N.S., XI, 199—214, Paris, 1938.
- Brocklesby, H. N. and Kuchel, C. C. The adsorption of vitamin A from oils by soaps formed *in situ*. Journ. Fish. Res. Board Canada, IV, 174—83, Toronto, 1938.
- Brusents, A. N. and Grindel, M. A. A quick and simple method for determining the moisture-content of fish products. Trans. Inst. Mar. Fish. and Oceanogr. of the USSR, VI, 121—38, Moscow, 1937. (In Russian, English résumé).
- Charnley, F. and Bolton, R. S. The measurement of firmness of canned salmon and other semi-rigid bodies by the dynamic penetrometer method. I. Experiments with a multiple needle penetrometer. Journ. Fish. Res. Board Canada, IV, 162—73, Toronto, 1938.
- Finn, D. B. "Putty Fish". Progress Rep. Atlant. Biol. Stat., etc., No. 23, 10—12, Canada, 1938.
- Hampton, W. F. Approved Methods of Handling Codfish for Salting and Drying. Dept. Nat. Resources, (Fisheries), Service Bull. No. 9, St. John's, Newfoundland, 1938.
- Hatton, S. R., and Smalley, G. R. Reduction Processes for Sardines in California. California Fish and Game, XXIV, 391—414, Sacramento, 1938.
- Hess, E. Shrinkage in Clam Canning. Progress Rep. Atlantic Biol. Stat., etc., No. 23, 8—9, Canada, 1938.
- Hureauquin, L. L'écueil des conserveurs: le noircissement des conserves de crustacés. La Pêche Marit., etc., XXI, 335—36, Paris, 1938.

- Hurequin, L. *Le Préchauffage*. *La Pêche Marit.*, etc., XXI, 13—14, Paris, 1939.
- Johnson, F. F. *Marketing of Shad on the Atlantic Coast*. U.S. Bureau Fish., II, Invest. Rep. No. 38, Washington, D.C., 1938.
- Johnson, W. W. *The Removal of Suspended Matter from the Effluent of Fish Meal Plants*. Progress Rep. Atlant. Biol. Stat., etc., No. 23, 3—4, Canada, 1938.
- Kalinina, K. A. *On the quantity of volatile sulphurous compounds in the fish and fish products and the methods of their determination*. Trans. Inst. Mar. Fish. and Oceanogr. of the USSR, VI, 3—16, Moscow, 1937. (In Russian, English résumé).
- Petrov, K. P. *Chemical and physical changes in connection with the oxydation and rancidity in stored fats of fish and sea, mammals, means for preventing oxydation*. Trans. Inst. Mar. Fish. and Oceanogr. of the USSR, VI, 17—48, Moscow, 1937. (In Russian, English résumé).
- Osoling, V. C. *Cooling of fish in crushed ice*. Trans. Inst. Mar. Fish. and Oceanogr. of the USSR, VI, 139—67, Moscow, 1937. (In Russian, English résumé).
- Serbinovskaya, E. L. and Grindel, M. A. *The determination of salinity in fish products*. Trans. Inst. Mar. Fish. and Oceanogr. of the USSR, VI, 103—20, Moscow, 1937. (In Russian, English résumé).
- Shewan, J. M. *Trimethylamine Formation in Relation to the Viable Bacterial Population of Spoiling Fish Muscle*. *Nature*, CXLIII, 284, London, 1939.
- Sunderland, P. A. *Spiced Surf Smelts*. Progress Rep. Pacific Biol. Stat., etc., No. 37, 17—18, Prince Rupert, B.C., 1938.
- Surzhin, S. N. *Liquid for the wet-smoking of fish (Research, preparation and technological tests)*. Trans. Inst. Mar. Fish. and Oceanogr. of the USSR, VI, 71—102, Moscow, 1937. (In Russian, English résumé).
- Tarr, H. L. A. and Sunderland, P. A. *Preliminary Note on the Keeping Quality of Lightly Smoked Fish*. Progress Rep. Pacific Biol. Stat., etc., No. 37, 7—11, Prince Rupert, B.C., 1938.
- Tarr, H. L. A., Young, O. C. and Sunderland, P. A. *The Effect of Exposure of Fresh Fillets to Ultraviolet Light on their Subsequent Keeping Quality*. Progress Rep. Pacific Biol. Stat., etc., No. 38, 3—6, Prince Rupert, B.C., 1938.
- Young, O. C. *The Quality of Fresh, Frozen and Stored Halibut as determined by a Tasting Panel*. Progress Rep. Pacific Biol. Stat., etc., No. 37, 12—16, Prince Rupert, B.C., 1938.

### 7) c Fishing Vessels and Gear.

- Béhuart, J. *La construction du Navire de Pêche. Un nouveau projet allemand de chalutiers insubmersibles*. *La Pêche Marit.*, etc., XXI, 10—11, Paris, 1938.
- Maldura, C. M. *La pesca nelle Isole Italiane dell'Egeo*. *Boll. Pesca, Piscicult. e Idrobiol.*, XIV, 460—81, Roma, 1938.
- Soulié, M. *La Construction du Navire de Pêche. L'évolution de la construction des chalutiers en Allemagne*. *La Pêche Marit.*, etc., XXI, 405—07, Paris, 1938.
- Yasuda, H. *Size of Meshes of a Used Fishing Net and its Strength*. *Bull. Japan. Soc. Sci. Fish.*, VII, 213—16, Tokyo, 1938. (In Japanese, English résumé).
- Zolezzi, G. *La pesca all'amo in Liguria*. *Boll. Pesca, Piscicult. e Idrobiol.*, XIV, 482—513, Roma, 1938.

### 7) d Fishing Grounds.

- Anon. *La campagne de pêche du "Potick" dans la mer des Antilles en 1938*. *La Pêche Marit.*, etc., XXI, 1—3, Paris, 1939.
- Fage, L. *Les obstacles naturels à la pêche aux arts traînants sur le littoral métropolitain de la Méditerranée*. *Comm. Internat. p. l'Explor. Sci. de la Mer Méditerranée*, Rapp. et Proc.-Verb. d. Réun., N.S., XI, 147—50, Paris, 1938.
- Kotthaus, A. et Zei, M. *Rapport sur la pêche expérimentale au chalut dans le littoral croate*. *Ann. Inst. Océanogr. du Royaume de Yougoslavie*, I, 125—40, Split, 1938. (In Croatian).

## 8) Marine Fishery Investigations.

### 8) a Stocks and Effects of Fishing.

- Bückmann, A. Deutsche Fischereiforschung im Nordstatlantik. Umschau, XL, Leipzig, 1938.
- Hagmeier, A. Die Arbeiten der Biologischen Anstalt auf Helgoland. Ber. Deutsch. wiss. Komm. f. Meeresf., N.F., IX, 65—110, Stuttgart, 1938.

### 8) b Cod.

- Le Breton, J.-F. La pêche de la morue. En eaux froides, les appâts peu volumineux conviennent mieux. La Pêche Marit., etc., XXI, 8—9, Paris, 1939.
- Frost, N. Newfoundland Fishes. A Popular Account of their Life Histories (Parts I and II). Dept. Nat. Resources, (Fisheries), Service Bull. No. 8, St. John's, Newfoundland, 1938.
- Hertling, H. Untersuchungen über die Ernährung von Meeresfischen. II. Quantitative Nahrungsuntersuchungen an Schellfischen (*Gadus aeglefinus*), Wittlingen (*G. merlangus*) und Dorschen (*G. morrhua*) aus der Nordsee unter besonderer Berücksichtigung des Wärmewertes der Nahrung. Ber. Deutsch. wiss. Komm. f. Meeresf., N.F., IX, 274—317, Stuttgart, 1938.

### 8) c Haddock.

- Hertling, H. Untersuchungen über die Ernährung von Meeresfischen. II. Quantitative Nahrungsuntersuchungen an Schellfischen (*Gadus aeglefinus*), Wittlingen (*G. merlangus*) und Dorschen (*G. morrhua*) aus der Nordsee unter besonderer Berücksichtigung des Wärmewertes der Nahrung. Ber. Deutsch. wiss. Komm. f. Meeresf., N.F., IX, 274—317, Stuttgart, 1938.

### 8) e Other Gadoids.

- Hertling, H. Untersuchungen über die Ernährung von Meeresfischen. II. Quantitative Nahrungsuntersuchungen an Schellfischen (*Gadus aeglefinus*), Wittlingen (*G. merlangus*) und Dorschen (*G. morrhua*) aus der Nordsee unter besonderer Berücksichtigung des Wärmewertes der Nahrung. Ber. Deutsch. wiss. Komm. f. Meeresf., N.F., IX, 274—317, Stuttgart, 1938.

### 8) f Plaice.

- Altnöder, K. Der Schollenjahrgang 1934 in der mittleren Ostsee. Ber. Deutsch. wiss. Komm. f. Meeresf., N.F., IX, 223—34, Stuttgart, 1938.
- Henschel, J. Beobachtungen über den Schollennachwuchs in der westlichen Ostsee in den Jahren 1935—1937. Ber. Deutsch. wiss. Komm. f. Meeresf., N.F., IX, 264—73, Stuttgart, 1938.

### 8) h Halibut.

- Schmidt, U. Fischereiwissenschaft und Praxis. Fischmarkt, N.F., VI, 286—93, Cuxhaven, 1938.
- Tåning, A. V. The Migrations of Small Halibut marked in Faroese Waters. Journ. du Conseil, XIII, 370—75, Copenhagen, 1938.

### 8) i Other Pleuronectidae.

- Jensen, A. J. C. The Races of Dab in the Danish Waters. Rep. Danish Biol. Stat., XLII, 55—63, Copenhagen, 1938.
- Poulsen, E. M. The Dab in the Danish Waters; Investigations on Stock and Growth. Rep. Danish Biol. Stat., XLII, 33—54, Copenhagen, 1938.

### 8) j Herring.

- Ekkenega, J. Heringsfischerei und Heringsfass. Fischmarkt, N.F., VI, 310—11, Cuxhaven, 1938.
- Ekkenega, J. How Germany increases her own Herring Supply. Big Jump in Last Decade. Fishing News, XXVII, 18, Aberdeen, 14. 1. 39.

- Erdmann, W. Ein Beitrag zur Rassenfrage beim Frühjahrshering des Firth of Forth. Ber. Deutsch. wiss. Komm. f. Meeresf., N.F., IX, 244—53, Stuttgart, 1938.
- Le Gall, J. Statistiques biologiques et considérations sur les populations de Harengs de la Manche Orientale et du Sud de la Mer du Nord. (Matériel prélevé en 1937). Rev. Trav. Office des Pêches Marit., XI, 145—56, Paris, 1938.
- Gilson, G. Contributions à l'étude du Hareng "Guai" dans le Sud de la Mer du Nord pendant les Années 1930 à 1938. Ann. Inst. d'Étude. Marit. d'Ostende, Mém. No. 4, Lierre, 1938.
- Hart, J. L. and Tester, A. L. The Tagging of Herring (*Clupea pallasii*) in British Columbia: Apparatus, Insertions, and Recoveries during 1937—38. Rep. Brit. Columbia Fish. Depart., 1937, 64—90, Victoria, B.C., 1938.
- Hart, J. L., Tester, A. L., Beall, D., and Tully, J. P. Chemical Analyses of Herring. Progress Rep. Pacific Biol. Stat., etc., No. 37, 19—21, Prince Rupert, B.C., 1938.
- Huntsman, A. G. International Passamaquoddy Fishery Investigations. Journ. du Conseil, XIII, 357—69, Copenhagen, 1938.
- Schnakenbeck, W. Die Untersuchungen über den Hering und die Heringsfischerei. Ber. Deutsch. wiss. Komm. f. Meeresf., N.F., IX, 111—34, Stuttgart, 1938.
- Steffen, W. Die grosse Heringsfischerei. Jahresber. Deutsch. Fisch., 1937, 298—302, Berlin, 1938.
- Storrow, B. and Cowan, D. Herring Investigations. Dove Mar. Lab. Rep. Cullercoats, Ser. 3, No. 5, 10—18, Newcastle-on-Tyne, 1938.
- Tester, A. L. What Time of Day are Herring Caught? Progress Rep. Pacific Biol. Stat., etc., No. 37, 3—6, Prince Rupert, B.C., 1938.
- Tester, A. L. Herring, the Tide, and the Moon. Progress Rep. Pacific Biol. Stat., etc., No. 38, 10—14, Prince Rupert, B.C., 1938.
- Wendt, R. Die deutsche Grosse Heringsfischerei im Jahre 1938. Fischmarkt, N.F., VII, 26—28, Cuxhaven, 1939.
- Wimpenny, R. S. A Routine Method for the Estimation of Fat in Plankton and its Application to Herring Tissues. Journ. du Conseil, XIII, 338—48, Copenhagen, 1938.

### 8) k Sardine and other Clupeoids.

- Boury, M. Le plomb dans le milieu marin. Rev. Trav. Office des Pêches Marit., XI, 157—65, Paris, 1938.
- Hart, J. L. The Efficiency of Magnets installed in British Columbia Reduction Plants in Recovering Sardine Tags. Progress Rep. Pacific Biol. Stat., etc., No. 38, 16—18, Prince Rupert, B.C., 1938.
- Hart, J. L. The Early Returns from Pilchard Tagging off the West Coast of Vancouver Island in 1938. Progress Rep. Pacific Biol. Stat., etc., No. 38, 18—20, Prince Rupert, B.C., 1938.
- Janssen, J. F. Second Report of Sardine Tagging in California. California Fish and Game, XXIV, 376—90, Sacramento, 1938.
- Kotthaus, A. Die jugoslawische Sardinenfischerei. Fischmarkt, N.F., VII, 2—10, Cuxhaven, 1939.
- Kotthaus, A. Sur la valeur de la statistique de pêche pour les problèmes de la biologie de pêche marine par rapport spécial à la sardine adriatique. Ann. Inst. Océanogr. du Royaume du Yougoslavie, I, 62—90, Split, 1938. (In Croatian, French résumé).
- Watanabe, M. and Hart, J. L. Sex Ratio among Pilchards on the Pacific Coast of North America. Bull. Japan. Soc. Sci. Fish., VI, 237—39, Tokyo, 1938.

### 8) l Tunny and Mackerel.

- Crocker, R. S. Historical Account of the Los Angeles Mackerel Fishery. Div. Fish. and Game Calif., Fish. Bull. No. 52, Sacramento, 1938.
- Heldt, H. Rapport sur le Thon Rouge et sa pêche (10ème Rapport). Comm. Internat. p. l'Explor. Sci. de la Mer Méditerranée, Rapp. et Proc.-Verb. d. Réun., N.S., XI, 311—58, Paris, 1938.
- Sklower, A. A Preliminary Report on the Mackerel (*Scomber scomber* Linné) of the Palestine. Comm. Internat. p. l'Explor. Sci. de la Mer Méditerranée, Rapp. et Proc.-Verb. d. Réun., N.S., XI, 475—91, Paris, 1938.

## 8) m Other Commercial Species.

- Arné, P. Contribution à l'étude de la biologie des Muges du Golfe de Gascogne. Comm. Internat. p. l'Explor. Sci. de la Mer Méditerranée, Rapp. et Proc.-Verb. d. Réunion, N.S., XI, 77—116, Paris, 1938.
- Craig-Bennett, A. The Grey Mullet Fishery of Palestine. Comm. Internat. p. l'Explor. Sci. de la Mer Méditerranée, Rapp. et Proc.-Verb. d. Réunion, N.S., XI, 69—72, Paris, 1938.
- Faouzi, H. Quelques aspects de la biologie des Muges en Égypte. Comm. Internat. p. l'Explor. Sci. de la Mer Méditerranée, Rapp. et Proc.-Verb. d. Réunion, N.S., XI, 62—68, Paris, 1938.
- Frost, N. Newfoundland Fishes. A Popular Account of their Life Histories. (Parts I and II). Dept. Nat. Resources, (Fisheries), Service Bull. No. 8, St. John's, Newfoundland, 1938.
- Metten, H. Reproduction of the Dogfish. Nature, CXLIII, 121—22, London, 1939.
- Pearson, J. C. The Life History of the Striped Bass, or Rockfish, *Roccus saxatilis* (Walbaum). Bull. Bureau Fish., XLIX, 825—51, U.S.A., 1938.
- Sanzo, L. Uova e Larve di "*Mugil labeo* Cuv". Comm. Internat. p. l'Explor. Sci. de la Mer Méditerranée, Rapp. et Proc.-Verb. d. Réunion, N.S., XI, 73—76, Paris, 1938.

## 8) o Whales and Seals.

- Behuard J. L'évolution technique de la pêche de la baleine. La Pêche Marit., etc., XXI, 331—33, Paris, 1938.
- Bonnot, P., Clark, G. H. and Hatton, S. R. California Sea Lion Census for 1938. California Fish and Game, XXIV, 415—19, Sacramento, 1938.
- Brunelli, G. Rapport sur les Mammifères marins (1er Rapport). Comm. Internat. p. l'Explor. Sci. de la Mer Méditerranée, Rapp. et Proc.-Verb. d. Réunion, N.S., XI, 301—10, Paris, 1938.
- Comrie, L. C. and Adam, A. B. The Female Reproductive System and Corpora Lutea of the False Killer Whale, *Pseudorca crassidens* Owen. Trans. Roy. Soc. Edinburgh, LIX, 521—31, Edinburgh, 1938.
- Peters, N. Der neue deutsche Walfang. Ein praktisches Handbuch seiner geschichtlichen, naturwissenschaftlichen und technischen Grundlagen. Landw. u. des R'wirtschaftsministeriums, Hansa, Hamburg, 1938.
- Senner, P. La pêche de la baleine. La Pêche Marit., etc., XXI, 329—30, Paris, 1938.
- Senner, P. L'exploitation technique d'une expédition baleinière. La Pêche Marit., etc., XXI, 365—66, Paris, 1938.
- Senner, S. Thrills of the Whale Pursuit. What Intense Exploitation has meant. Fishing News, XXVII, 10, Aberdeen, 14. 1. 39.

## 9) Freshwater Fisheries and Fishery Investigations.

## 9) a Salmonidae.

- Allen, K. R. Some observations on the biology of the trout (*Salmo trutta*) in Windermere. Journ. Anim. Ecology, VII, 333—49, London, 1938.
- Éire. Statistics of Salmon, Sea Trout, and Eels captured during each of the years 1937, 1935, 1933, 1931, 1929, and 1927. Dept. Agric. (Fish. Branch), Dublin, 1938.
- England. Salmon and Freshwater Fisheries. Report for the Year 1937. Min. Agric. and Fish., Fish. — England and Wales, London, 1938.
- Foerster, R. E. An investigation of the relative efficiencies of natural and artificial propagation of sockeye salmon (*Oncorhynchus nerka*) at Cultus Lake, British Columbia. Journ. Fish. Res. Board Canada, IV, 151—61, Toronto, 1938.
- Foerster, R. E. Mortality trend among young sockeye salmon (*Oncorhynchus nerka*) during various stages of lake residence. Journ. Fish. Res. Board Canada, IV, 184—91, Toronto, 1938.
- Fowke, P. Trout Culture in Ceylon. Ceylon Journ. Sci., VI, 1—78, Colombo, 1938.
- Järvi, T. H. Kymojokeen istutettu "lohi" saatu Puolassa. Suomen Kalastuslehti, XLV, 72—74, Helsinki, 1938.

- King, G. M., Jones, J. W. and Orton, J. H. Behaviour of Mature Male Salmon Parr, *Salmo salar* juv. L. Nature, CXLIII, 162—63, London, 1939.
- Krokhin, E. M. and Krogius, F. V. Study of the Basin of the Bolshaya River and of its Salmon Spawning Places. Bull. Pacific Sci. Inst. of Fish and Oceanogr., IX, 1—157, Vladivostok, 1937. (In Russian, English résumé).
- Leach, G. C., and James, M. C. Propagation and Distribution of Food Fishes: Fiscal Year 1937. U.S. Bureau Fish., Admin. Rep. No. 33, 461—92, Washington, D.C., 1938.
- Menzies, W. J. M. The Movements of Salmon marked in the Sea. III. The Island of Soay and Ardnamurchan in 1938. Fish. Scotland, Salmon Fish., 1938, No. VII, Edinburgh, 1938.
- Meyer, P. F. Aussetzungen von Regenbogenforellen (*Salmo irideus* Gibb.) in die Ostsee. Ber. Deutsch. wiss. Komm. f. Meeresf., N.F., IX, 318—23, Stuttgart, 1938.
- Neill, R. M. The Food and Feeding of the Brown Trout (*Salmo trutta* L.) in Relation to the Organic Environment. Trans. Roy. Soc. Edinburgh, LIX, 481—520, Edinburgh, 1938.
- Otterstrøm, C. V. On Methodical Liberations of Salmon and Trout Fry in Watercourses with Special Reference to the Gudena Area. Rep. Danish Biol. Stat., XLII, 3—32, Copenhagen, 1938.
- Otterstrøm, C. V. 125 Salmon from West Jutland. Medd. Komm. Danmarks Fisk.-og Havunders., Ser. Fiskeri, X, Nr. 6, København, 1938.
- Reinwaldt, E. ja Järvi, T. H. Eestissä merkittyjen lohien vaellustie. Suomen Kalastuslehti, XLV, 69—72, Helsinki, 1938.
- Ricker, W. E. "Residual" and kokanee salmon in Cultus lake. Journ. Fish. Res. Board Canada, IV, 192—218, Toronto, 1938.
- Rounsefell, G. A. and Kelez, G. B. The Salmon and Salmon Fisheries of Swiftsure Bank, Puget Sound, and the Fraser River. Bull. Bureau Fish., XLIX, Bull. No. 27, U.S.A., 1938.
- Snyder, C. O. A Study of the Trout (*Salmo irideus* Gibbons) from Waddell Creek, California. California Fish and Game, XXIV, 354—75, Sacramento, 1938.
- Tchernavin, V. The Absorption of Bones in the Skull of Salmon during their Migration to Rivers. Fish. Scotland, Salmon Fish., 1938, No. VI, Edinburgh, 1938.

#### 9) b Eels.

- Bertin, L. Formes nouvelles et formes larvaires de poissons Apodes appartenant au sous-ordre des Lyomères. Carlsberg Foundation Oceanogr. Exped. round the World 1928—30 and previous "Dana" Expeditions, Dana Rep. No. 15, Copenhagen, 1938.
- Éire. Statistics of Salmon, Sea Trout and Eels captured during each of the Years 1937, 1935, 1933, 1931, 1929, and 1927. Dept. Agric. (Fish. Branch), Dublin, 1938.
- Gandolffi-Hornoyold, A. Observations sur l'anguille de la côte Yougoslave de l'Adriatique (Neretva, Split et Trogir). Ann. Inst. Océanogr. du Royaume de Yougoslavie, I, 159—77, Split, 1938. (In French).
- Hansen, I. B. The experimental hormonal stimulation of the reproductive organs of the common eel. Bull. Mt. Desert Is. Biol. Lab. 1939, 25—26, Salsbury Cove, Me., 1939.
- Pellegrin, J. et Spillmann, J. Inégalité de développement et cannibalisme chez l'anguille. Bull. Soc. Cent. d'Aquicult. et de Pêche, XLV, 65—69, Paris, 1938.
- Tåning, A. V. Deep-Sea Fishes of the Bermuda Oceanographic Expeditions. Family Anguillidae. Zoologica, XXIII, 313—18, New York, 1938.

#### 9) c Other Commercial Species.

- Fontaine, M. Quelques acquisitions récentes concernant la physiologie et la biochimie des lamproies. Bull. Soc. Cent. d'Aquicult. et de Pêche, XLV, 74—77, Paris, 1938.

#### 9) d Effects of Pollution.

- Brunelli, G. Rapport sur la pollution des eaux de mer (2ème Rapport). Comm. Internat. p. l'Explor. Sci. de la Mer Méditerranée, Rapp. et Proc. Verb. d. Réunion. N.S., XI, 359—74, Paris, 1938.

- Jardin, F. et Chevalier, A. Recherches sur la pollution des eaux marines par le déversement des égouts urbains. Rev. Trav. Offices des Pêches Marit., XI, 213—29, Paris, 1938.
- Jardin, F. et Yzambart, C. Recherches sur la pollution des eaux marines par le déversement des égouts urbains. (2<sup>e</sup> rapport). Rev. Trav. Office des Pêches Marit., XI, 231—57, Paris, 1938.

### 9) e Ecology.

- Laurie, R. D. and Jones, J. R. E. The Faunistic recovery of a lead-polluted river in North Cardiganshire, Wales. Journ. Anim. Ecology, VII, 272—89, London, 1938.

## 10) Shellfisheries.

### 10) a Molluscs.

- Boury, M. Le plomb dans le milieu marin. Rev. Trav. Office des Pêches Marit., XI, 157—65, Paris, 1938.
- Chaux-Thevenin, H. Note sur la production du naissain d'huîtres portugaises dans la région de Marennes en 1937. Rev. Trav. Office des Pêches Marit., XI, 197—206, Paris, 1938.
- Gunter, G. Comments on the Shape, Growth, and Quantity of the American Oyster. Science, N.S., LXXXVIII, 546—47, U.S.A., 1938.
- Haranghy, L. Experimentelle Beiträge zur Kenntnis der Wasserreinigung und Wasserkärungswirkung der Seemuscheln. Pubbl. Staz. Zool. di Napoli, XVII, 59—91, Roma, 1938.
- Herman, A. La reproduction des huîtres indigènes dans le Morbihan et le Finistère en 1937. Rev. Trav. Office des Pêches Marit., XI, 189—95, Paris, 1938.
- Kühnelt, W. Beziehungen zwischen Kalkstoffwechsel und Atmung bei Mollusken der Meeresküste. Zool. Anz., CXXIV, 182—90, Leipzig, 1938.
- Ladouce, R. Observations sur la production du naissain dans le bassin d'Arcachon en 1937. Rev. Trav. Offices des Pêches Marit., XI, 207—211, Paris, 1938.
- Ménager, V. Note sur l'état actuel des gisements de coquillages comestibles des côtes de l'île d'Yeu. Bull. Soc. d'Océanogr. de France, XVIII, 1748—49, Paris, 1938.
- Miyazaki, I. Some Notes on the Cross-fertilization of Japanese Oysters. Bull. Japan. Soc. Sci. Fish., VII, 257—61, Tokyo, 1939.
- Parke, M. Report on Oyster Investigations, 1938. Mar. Biol. Stat. Port Erin, Isle of Man, Rep. for 1938 (No. 51), 12—13, Liverpool, 1938.
- Prytherch, H. F. Life-cycle of a Sporozoan Parasite of the Oyster. Science, N.S., LXXXVIII, 451—52, U.S.A., 1938.
- Ranson, C. Contribution à l'étude du développement de l'Huître portugaise (*Gryphaea angulata* Lmk.). Bull. Mus. Nation. d'Hist. Nat., 2e Sér., X, 410—24, Paris, 1938.
- Storrow, B. Experiments in transplanting Mussels at Whitby. Dove Mar. Lab. Rep. Cullercoats, Ser. 3, No. 5, 41—42, Newcastle-on-Tyne, 1938.
- Teissonnière, M. Rapport sur l'hygiène et la salubrité des Coquillages (3<sup>ème</sup> Rapport). Comm. Internat. p. l'Explor. Sci. de la Mer Méditerranée, Rapp. et Proc.-Verb. d. Réunion, N.S., XI, 375—404, Paris, 1938.

### 10) b Crustacea.

- Boury, M. Le plomb dans le milieu marin. Rev. Trav. Office des Pêches Marit., XI, 157—65, Paris, 1938.

## 11) Miscellaneous.

### 11) a General.

- Deraniyagala, P. E. P. The Loggerhead Turtles in the National Museum of Ireland, with special reference to those taken in Irish Waters. Irish Naturalists' Journ. VII, 66—70, Dublin, 1938.
- Dice, L. R. A Simple Method for Filing Miniature Negatives and microfilm Records in strips. Science, N.S., LXXXIX, 39—40, U.S.A., 1939.

- Fischer, E. und Wjller, A. Die wichtigste Fischereiliteratur aus dem Jahre 1937. Jahresber. Deutsch. Fisch., 1937, 411—27, Berlin, 1938.
- Hachey, H. B. "Jellyfish" Forecast the Hurricane of September 21st. Progress Rep. Atlant. Biol. Stat., etc., No. 23, 13—14, Canada, 1938.
- M. A. F. List of Publications relating to Fisheries. Min. Agric. and Fish., Fish. Notice No. 6, London, 1938.
- Parker, H. W. Marine Turtles as Current Indicators. Nature, CXLIII, 121, London, 1939.
- Russell, F. S. Turtles in the English Channel. Nature, CXLIII, 206—07, London, 1939.
- Serventy, D. L. The Feeding Habits of Cormorants in South-Western Australia. Emu, XXXVIII, 293—316, Melbourne, 1938.
- Versey, H. C. The North Sea Earthquake of 1931 June 7. Monthly Notices Roy. Astr. Soc., Geophys. Suppl., IV, 416—23, London, 1939.

#### 11) b Mathematical and Statistical Methods.

- Fisher, R. A. and Yates, F. Statistical Tables for Biological, Agricultural and Medical Research. Edinburgh, 1938.
-
